1 **Cross-platform genetic discovery of small molecule products of metabolism and application to**  
2 **clinical outcomes**

3  
4 Luca A. Lotta<sup>1#</sup>, Maik Pietzner<sup>1#</sup>, Isobel D. Stewart<sup>1</sup>, Laura B.L. Wittemans<sup>1,2</sup>, Chen Li<sup>1</sup>, Roberto  
5 Bonelli<sup>3,4</sup>, Johannes Raffler<sup>5</sup>, Emma K. Biggs<sup>6</sup>, Clare Oliver-Williams<sup>7,8</sup>, Victoria P.W. Auyeung<sup>1</sup>, Jian'an  
6 Luan<sup>1</sup>, Eleanor Wheeler<sup>1</sup>, Ellie Paige<sup>9</sup>, Praveen Surendran<sup>7,10,11,12</sup>, Gregory A. Michelotti<sup>13</sup>, Robert A.  
7 Scott<sup>1</sup>, Stephen Burgess<sup>14,15</sup>, Verena Zuber<sup>14,16</sup>, Eleanor Sanderson<sup>17</sup>, Albert Koulman<sup>1,5,18</sup>, Fumiaki  
8 Imamura<sup>1</sup>, Nita G. Forouhi<sup>1</sup>, Kay-Tee Khaw<sup>15</sup>, MacTel Consortium, Julian L. Griffin<sup>19</sup>, Angela M.  
9 Wood<sup>7,10,11,20,21</sup>, Gabi Kastenmüller<sup>5</sup>, John Danesh<sup>7,10,11,20,22,23</sup>, Adam S. Butterworth<sup>7,10,11,20,22,23</sup>, Fiona  
10 M. Gribble<sup>6</sup>, Frank Reimann<sup>6</sup>, Melanie Bahlo<sup>3,4</sup>, Eric Fauman<sup>24</sup>, Nicholas J. Wareham<sup>1</sup>, Claudia  
11 Langenberg<sup>1,11\*</sup>

12  
13 *# these authors contributed equally*

- 14  
15 1) MRC Epidemiology Unit, University of Cambridge, Cambridge, UK  
16 2) The Big Data Institute, Li Ka Shing Centre for Health Information and Discovery, University of Oxford  
17 3) Population Health and Immunity Division, The Walter and Eliza Hall Institute of Medical Research,  
18 Parkville, Australia  
19 4) Department of Medical Biology, The University of Melbourne, Parkville, Australia  
20 5) Institute of Computational Biology, Helmholtz Zentrum München – German Research Center for  
21 Environmental Health, Neuherberg, Germany  
22 6) Metabolic Research Laboratories, University of Cambridge, Cambridge, United Kingdom  
23 7) British Heart Foundation Cardiovascular Epidemiology Unit, Department of Public Health and Primary  
24 Care, University of Cambridge, Cambridge, UK  
25 8) Homerton College, University of Cambridge, Cambridge, UK  
26 9) National Centre for Epidemiology and Population Health, The Australian National University, Canberra,  
27 Australia  
28 10) British Heart Foundation Centre of Research Excellence, University of Cambridge, Cambridge, UK  
29 11) Health Data Research UK Cambridge, Wellcome Genome Campus and University of Cambridge,  
30 Cambridge, UK  
31 12) Rutherford Fund Fellow, Department of Public Health and Primary Care, University of Cambridge, UK  
32 13) Metabolon Inc, Durham, North Carolina USA  
33 14) MRC Biostatistics Unit, University of Cambridge, Cambridge, United Kingdom  
34 15) Department of Public Health and Primary Care, University of Cambridge, Cambridge, United Kingdom  
35 16) Department of Epidemiology and Biostatistics, Imperial College London, UK  
36 17) MRC Integrative Epidemiology Unit, Bristol Medical School, University of Bristol, UK  
37 18) NIHR BRC Nutritional Biomarker Laboratory, University of Cambridge, UK  
38 19) Biomolecular Medicine, Department of Metabolism, Digestion and Reproduction, Imperial College  
39 London, UK  
40 20) National Institute for Health Research Blood and Transplant Research Unit in Donor Health and Genomics,  
41 University of Cambridge, Cambridge, UK  
42 21) The Alan Turing Institute, London, UK  
43 22) National Institute for Health Research Cambridge Biomedical Research Centre, University of Cambridge  
44 and Cambridge University Hospitals, Cambridge, UK  
45 23) Department of Human Genetics, Wellcome Sanger Institute, Hinxton, UK  
46 24) Internal Medicine Research Unit, Pfizer Worldwide Research, Cambridge, MA 02142, USA

47  
48 \*Corresponding author:

49 Claudia Langenberg  
50 MRC Epidemiology Unit  
51 University of Cambridge School of Clinical Medicine  
52 Institute of Metabolic Science  
53 Cambridge, UK  
54 [claudia.langenberg@mrc-epid.cam.ac.uk](mailto:claudia.langenberg@mrc-epid.cam.ac.uk)

55 **Abstract**

56       Circulating levels of small molecules or metabolites are highly heritable, but the impact of  
57 genetic differences in metabolism on human health is not well understood. In this cross-platform,  
58 genome-wide meta-analysis of 174 metabolite levels across six cohorts including up to 86,507  
59 participants (70% unpublished data), we identify 499 (362 novel) genome-wide significant  
60 associations ( $p < 4.9 \times 10^{-10}$ ) at 144 (94 novel) genomic regions. We show that inheritance of blood  
61 metabolite levels in the general population is characterized by pleiotropy, allelic heterogeneity, rare  
62 and common variants with large effects, non-linear associations, and enrichment for  
63 nonsynonymous variation in transporter and enzyme encoding genes. The majority of identified  
64 genes are known to be involved in biochemical processes regulating metabolite levels and to cause  
65 monogenic inborn errors of metabolism linked to specific metabolites, such as *ASNS* (rs17345286,  
66 MAF=0.27) and asparagine levels. We illustrate the influence of metabolite-associated variants on  
67 human health including a shared signal at *GLP2R* (p.Asp470Asn) associated with higher citrulline  
68 levels, body mass index, fasting glucose-dependent insulinotropic peptide and type 2 diabetes risk,  
69 and demonstrate beta-arrestin signalling as the underlying mechanism in cellular models. We link  
70 genetically-higher serine levels to a 95% reduction in the likelihood of developing macular  
71 telangiectasia type 2 [odds ratio (95% confidence interval) per standard deviation higher levels 0.05  
72 (0.03-0.08;  $p = 9.5 \times 10^{-30}$ )]. We further demonstrate the predictive value of genetic variants identified  
73 for serine or glycine levels for this rare and difficult to diagnose degenerative retinal disease [area  
74 under the receiver operating characteristic curve: 0.73 (95% confidence interval: 0.70-0.75)], for  
75 which low serine availability, through generation of deoxysphingolipids, has recently been shown to  
76 be causally relevant. These results show that integration of human genomic variation with  
77 circulating small molecule data obtained across different measurement platforms enables efficient  
78 discovery of genetic regulators of human metabolism and translation into clinical insights.

79

## 80 Introduction

81 Metabolites are small molecules that reflect biological processes and are widely measured in  
82 clinical medicine as diagnostic, prognostic or treatment response biomarkers<sup>1</sup>. Blood levels of  
83 metabolites are highly heritable with twin studies reporting a median explained variance in plasma  
84 levels of 6.9% and maximum of 50% depending on the metabolite<sup>2,3</sup>. Several earlier studies have  
85 started to characterise the genetic architecture of metabolite variation in the general population<sup>2-10</sup>,  
86 but been limited in size and scope by focussing on metabolites assessed using a single method.  
87 Integration of genetic association results for metabolites measured on different platforms can help  
88 maximise the power for a given metabolite and provide a more refined understanding of genetic  
89 influences on blood metabolite levels and human physiology.

90 To identify genomic regions regulating metabolite levels and systematically study their  
91 relevance for disease, we designed and conducted a cross-platform meta-analysis of genetic effects  
92 on levels of 174 blood metabolites measured in large-scale population-based studies. We included  
93 metabolites covered by the targeted Biocrates AbsoluteIDQ™ p180 platform and measured in the  
94 Fenland Study. We integrated unpublished data for any of these metabolites that were covered by  
95 the Nightingale (<sup>1</sup>H-NMR, Interval Study) or Metabolon (Discovery HD4™, EPIC-Norfolk and Interval  
96 Studies) platforms, or had previously been reported<sup>2,4,5</sup>. The focus on this targeted set of ‘platform-  
97 specific’ metabolites enabled us to clearly map metabolites across platforms and maximise the  
98 sample size for each of the 174 metabolites for this proof of concept cross-platform GWAS study. To  
99 facilitate rapid sharing of our results, we developed a webserver  
100 (<https://omicscience.org/apps/crossplatform/>) that allows flexible interrogation of our results.

## 101 Results

### 102 *Associations with blood metabolites at 144 genomic regions*

103 Genome-wide meta-analyses were conducted for 174 metabolites from 7 biochemical classes  
104 (i.e. amino acids, biogenic amines, acylcarnitines, lyso-phosphatidylcholines, phosphatidylcholines,  
105 sphingomyelins and hexose) commonly measured using the Biocrates p180 kit in up to 86,507  
106 individuals, contributing over 3.7 million individual-metabolite data points (70% from unpublished  
107 studies; **Fig. 1**). For each of the 174 metabolites, this was the largest genome-wide association  
108 analyses (GWAS) to date, with at least a doubling of sample size (**Fig. 1A**). Sample sizes ranged from  
109 8,569 to 86,507 individuals for metabolites depending on the platform used in each contributing  
110 study. Using GWAS analyses we estimated the association of up to 10.2 million single nucleotide  
111 variants with a minor allele frequency (MAF) >0.5%, including 6.1 million with MAF ≥ 5%.

112 We identified 499 variant-metabolite associations (362 novel) from 144 loci (94 novel) at a  
113 metabolome-adjusted genome-wide significance threshold of  $p < 4.9 \times 10^{-10}$  (correcting the usual  
114 GWAS-threshold,  $p < 5 \times 10^{-8}$ , for 102 principal components explaining 95% of the variance in  
115 metabolite levels using principal component analysis; **Fig. 1**). The vast majority of these associations  
116 were consistent across studies and measurement platforms [median  $I^2$ : 26.8 (interquartile range: 0 –  
117 70.1) for 465 associations with at least two contributing studies] (**Supplementary Tab. S1-2**). To  
118 identify possible sources of heterogeneity, we investigated the influence of differences by cohort,  
119 measurement platform, metabolite class, and association strength in a joint meta-regression model  
120 (**Supplementary Tab. S3**). This showed that heterogeneity was mainly due to the overall strength of  
121 the signal, i.e. associations with higher z-scores showed greater heterogeneity ( $p < 1.05 \times 10^{-9}$ ).  
122 However, the majority of these statistically heterogeneous associations were directionally consistent  
123 and nominally significant across and within each stratum for 146 of 170 associations with a z-score >  
124 10, demonstrating the feasibility of pooling association estimates across metabolomics platforms for  
125 the purpose of genetic discovery. Genetic variants at the *NLRP12* locus, e.g. rs4632248, were a  
126 notable exception with large estimates of heterogeneity ( $I^2 > 90\%$ ). The *NLRP12* locus is known to  
127 affect the monocyte count<sup>11</sup> and has been shown to have pleiotropic effects on the plasma  
128 proteome in the INTERVAL study<sup>12</sup>. Monocytes, or at least a subpopulation subsumed under this cell  
129 count measure, release a wide variety of biomolecules upon activation or may die during the sample  
130 handling process and hence releasing intracellular biomolecules, such as taurine<sup>13</sup>, into the plasma.  
131 In brief, one specific source of heterogeneity in mGWAS associations might relate to sample  
132 handling differences across studies.

133 This highlights the utility of our genetic cross-platform approach to maximise power for a given  
134 metabolite, substantially extending previous efforts for any given metabolite<sup>14</sup>. Previously reported  
135 associations from platform-specific studies were also found to generally be consistent in our cross-  
136 platform meta-analysis (**Supplementary Tab. S2**; <https://omicscience.org/apps/crossplatform/>).

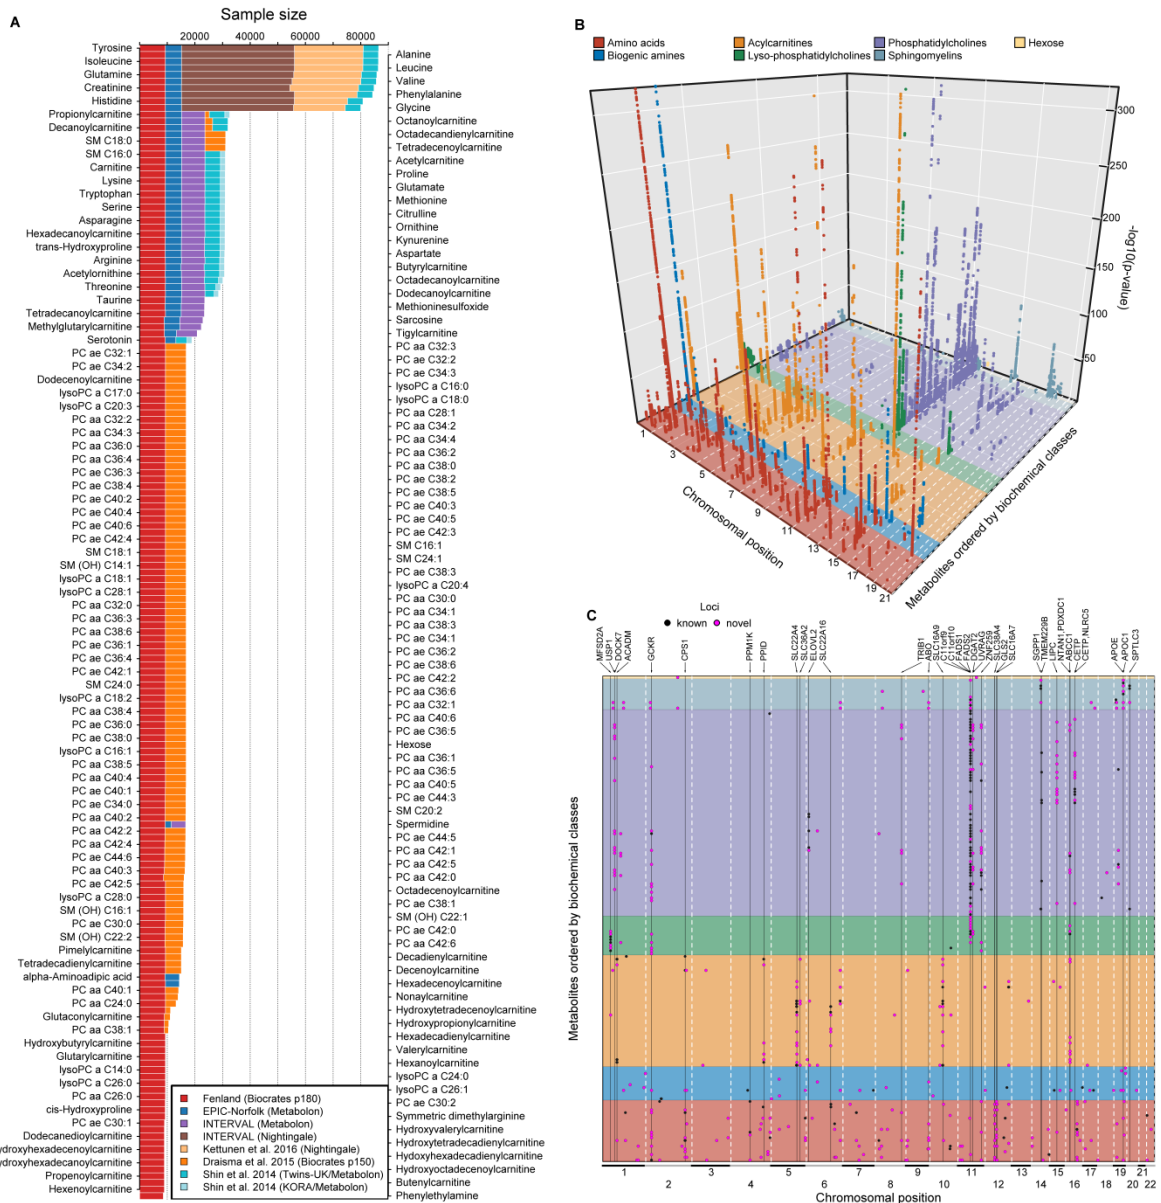

137

138

139

140

141

142

143

144

### Insights in the genetic architecture of metabolite levels

145

146

147

148

149

We identified a median of 2 (range: 1-67, **Fig. 2A**) associated metabolites for each locus and a median of 3 (range: 1-20, **Fig. 2B**) locus associations for each metabolite, reflecting pleiotropy and the extensive contribution of genetic loci to circulating metabolite levels. The number of associations was proportional to the estimated heritability and the sample size of the meta-analysis for a given trait (**Fig. 2C**).

150 We applied a multi-trait statistical colocalisation method<sup>15</sup> and identified between 1-30  
151 (median: 2) metabolites that did not meet the discovery p-value threshold, but showed high  
152 posterior probability (>75%) of a shared genetic signal for 49 out of the 144 loci (**Supplemental Fig.**  
153 **S1**). Two distinct variants (rs2414577 and rs261334) nearby *LIPC* showed the largest gain in  
154 additionally associated metabolites, in line with previous reports of extensive pleiotropy and allelic  
155 heterogeneity at this locus<sup>9</sup>. We note that a low posterior probability for the alignment of multiple  
156 metabolites at other loci might be explained by the presence of multiple causal variants shared  
157 across multiple metabolites.

158 To systematically classify pleiotropic variants taking into account the correlation structure  
159 among metabolites we derived a data-driven metabolic network and performed community  
160 detection (see **Methods** and **Supplemental Fig. S2**). A total of 129 (60.5%) of 214 variants  
161 (associated with at least two metabolites at  $p < 5 \times 10^{-8}$ ) were associated with metabolites from at  
162 least two of the 14 communities (range: 2 – 11; **Supplemental Fig. S2**), i.e. showed evidence for  
163 ‘horizontal’ or broad pleiotropy. The most extreme variants included those near *FADS1* (e.g.  
164 rs17455) associated with 61 metabolites across 11 communities at  $p < 5 \times 10^{-8}$ . In contrast, rs2638315  
165 (likely tagging a missense variant rs2657879 at *GLS2*) was associated with nine metabolites within a  
166 single community and would therefore be considered as ‘horizontal pleiotropic’ for a well-defined  
167 group of correlated metabolites (**Supplemental Fig. S2**).

168 Similar to what is routinely observed in GWAS literature, effect size estimates increased with  
169 decreasing minor allele frequency (MAF) (**Fig. 3A**). However, there were 26 associations (**Tab. 1**) for  
170 common lead variants with per-allele differences in metabolites levels greater than 0.25 standard  
171 deviations (SD), a per-allele effect size that is >3-fold larger than the strongest common variants  
172 associated with SDs of body mass index at the *FTO* locus.

173 Variants identified in this study explained up to 23% of the variance (median: 1.4%; interquartile  
174 range: 0.5% - 2.8%) and up to 99.8% of the chip-based heritability (median 9.2%; interquartile range:  
175 4.7% - 17.1%) for the 141 metabolites with at least one genetic association (**Fig. 2D**). The 26 common  
176 variants with large effect sizes (>0.25 SD per allele) were identified for metabolites with higher  
177 heritability (**Fig. 2D**) and accounted for up to 74% of the heritability explained in those metabolites.

178 GWAS analyses generally assume a linear relationship between genotypes and phenotypes, i.e.  
179 an additive dose-response model. The identification of several metabolite-associated variants with  
180 large effect sizes and availability of individual-level data in the Fenland cohort allowed us to test  
181 whether the metabolite-associated variants showed evidence of deviation from a linear model. Of  
182 499 associations tested, 9 showed evidence of departure from a linear association (**Fig. 2E-M**).



183 Modelling actual genotypes rather than assuming ‘additive’ linear associations in these instances  
 184 explained a median of 7.4% more (range: 1.4-15.2%) of the heritability in metabolite levels (**Fig. 2N**).  
 185 Associations better described by an autosomal recessive or dominant model of inheritance might be  
 186 the most likely explanation for this. Variant rs3916, for example, which showed a more than additive  
 187 positive effect on butyrylcarnitine, is in perfect LD with a missense variant within *ACADS*  
 188 (rs1799958, MAF=26%), which encodes for short-chain acyl-CoA dehydrogenase (SCAD). SCAD  
 189 deficiency is an autosomal recessive disease diagnosed by elevated butyrylcarnitine concentrations  
 190 in blood and homozygous carrier status for established pathogenic variants<sup>16</sup>.

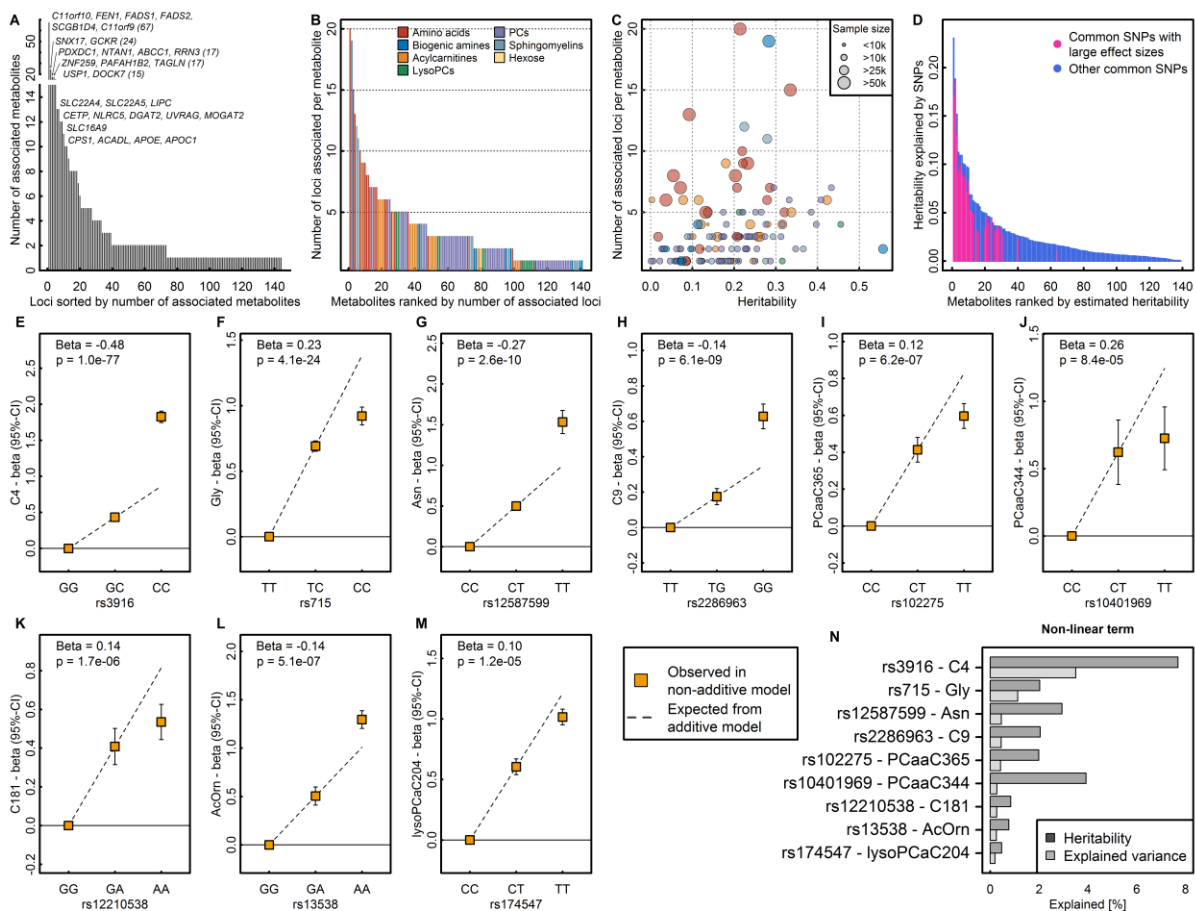

191

192 **Figure 2A** Distribution of pleiotropy, i.e. number of associated metabolites, among loci identified in the present study. **B**  
 193 Distribution of polygenicity of metabolites, i.e. number of identified loci for each metabolite under investigation. **C**  
 194 Scatterplot comparing the estimated heritability of each metabolite against the number of associated loci. Size of the dots  
 195 indicates sample sizes. **D** Heritability estimates for single metabolites. Colours indicate the proportion of heritability  
 196 attributed to single nucleotide polymorphisms (SNPs) with large effect sizes ( $\beta > 0.25$  per allele). **E – M** SNP – metabolite  
 197 association with indication of non-additive effects. Beta is an estimate from the departure of linearity. **N** Barplot showing  
 198 the increase in heritability and explained variance for each SNP – metabolite pair when including non-additive effects.

199

200 In 61 of the 499 associations the lead association signal was a nonsynonymous variant, a 40-fold  
 201 enrichment compared to what would be expected by chance given the annotation of ascertained  
 202 genetic variants (two-tailed binomial test,  $p = 5 \times 10^{-30}$ , **Fig. 3D**). For a further 59 associations, the lead  
 203 variant was in high LD with a nonsynonymous variant ( $r^2 > 0.8$ ). Lead variants that were

204 nonsynonymous, or variants in high LD with a nonsynonymous variant, generally had lower MAF,  
 205 larger effect sizes, and smaller 99%-credible sets (**Supplemental Tab. S4**) than variants that were not  
 206 in these categories (**Fig 3B-D**).

207

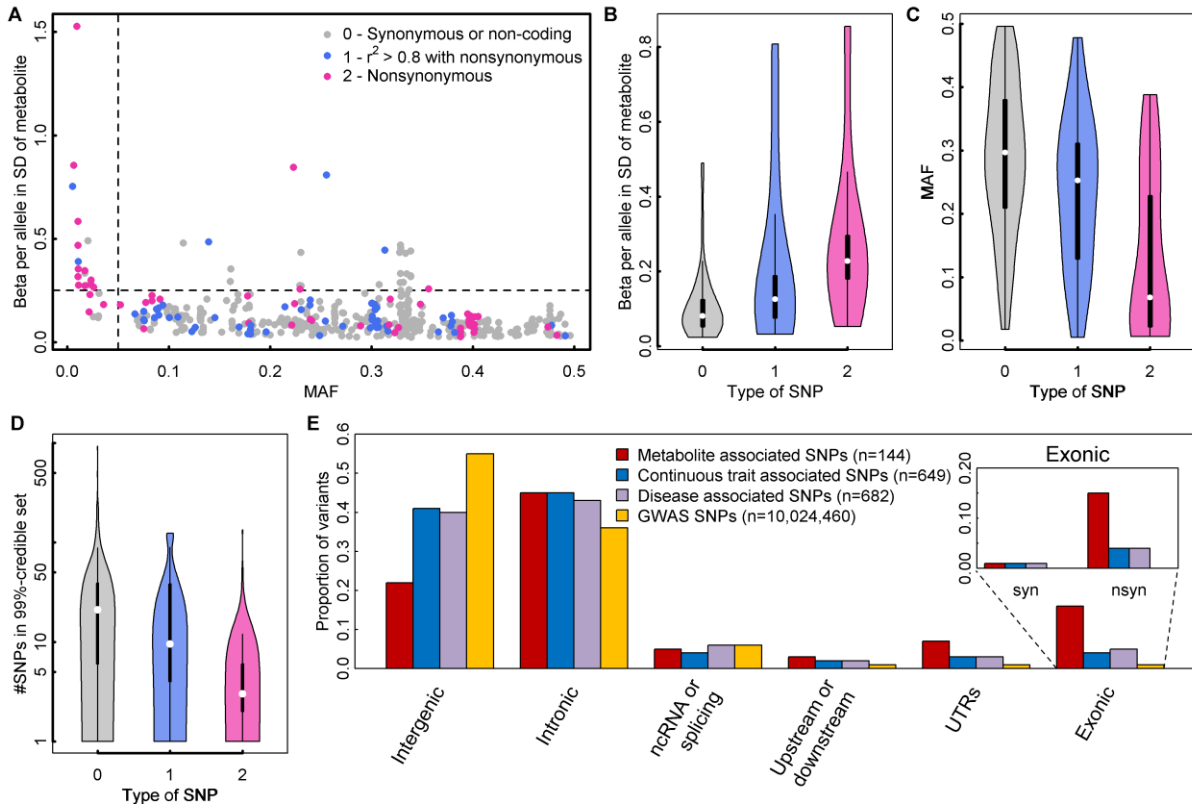

208

209 **Figure 3A** Scatterplot comparing the minor allele frequencies (MAF) of associated variants with effect estimates from linear  
 210 regression models (N loci=499). Colours indicate possible functional consequences of each variant: maroon –  
 211 nonsynonymous variant; blue – in strong LD ( $r^2 > 0.8$ ) with a nonsynonymous variant and grey otherwise. **B-D** Distribution of  
 212 effect sizes (B), allele frequencies (C), and width of credible sets (D) based on the type of single nucleotide polymorphism  
 213 (SNP) (0 – non-coding or synonymous, 1 – in strong LD with nonsynonymous, 2 – nonsynonymous). **E** Distribution of  
 214 functional annotations of metabolite associated variants (red), trait-associated variants (blue – continuous, purple –  
 215 diseases) obtained from the GWAS catalogue, and all SNPs included in the present genome-wide association studies. The  
 216 inset for exonic variants distinguishes between synonymous (syn) and nonsynonymous variants (nsyn).

217

218 We identified 22 loci harbouring two (n=21) or three (n=1) independent signals, i.e. different  
 219 plasma metabolites were associated with distinct genetic variants within the same genomic region  
 220 (**Supplementary Tab. S2**). For six regions, our two different annotations approaches assigned only  
 221 one causal gene (see below and **Methods**), including *ACADM*, *GLDC*, *ARG1*, *MARCH8*, *SLC7A2*, and  
 222 *LIPC* (**Supplementary Tab. S2**). We found evidence that allelic heterogeneity, i.e. conditionally  
 223 independent variants at a locus for a specific metabolite, explains the association pattern at 3 of  
 224 those loci (*ACADM*, *ARG1*, and *LIPC*; **Supplementary Tab. S5**). We identified another 16 loci  
 225 harbouring at least one (range: 2–6) additional conditionally independent variant(s) in exact  
 226 conditional analyses (see **Methods**, **Supplementary Tab. S5**).



227 *Effector genes, tissues, pathways*

228 We used two complementary strategies to prioritize likely causal genes for the observed  
229 associations: (1) a hypothesis-free genetic approach based on physical distance, genomic annotation  
230 and integration of expression quantitative trait loci (eQTLs) to prioritize genes in a systematic and  
231 standardised way (see **Methods**), and (2) a biological knowledge-based approach integrating existing  
232 knowledge about specific metabolites or related pathways to identify biologically plausible  
233 candidate genes from the 20 genes closest to the lead variant (**Fig. 4A**). Using the hypothesis-free  
234 genetic approach, we identified 249 unique likely causal genes for the 499 associations, with at least  
235 one gene per association and some genes prioritized as likely causal for multiple metabolite  
236 associations. The knowledge-based approach identified 130 biologically plausible genes for 349 out  
237 of 499 associations. We asked whether the hypothesis-free genetic approach identified biologically  
238 plausible genes (prioritized by strategy 2) more often than expected by chance. Amongst 9,980  
239 possible gene-metabolite pairs (20 genes x 499 associations), 420 (4.2%) were biologically plausible,  
240 condensed to 350 gene(s)-metabolite assignments after accounting for overlapping annotations. Of  
241 the latter, 126 pairs (36%) were identical to genetically-prioritized gene-metabolite pairs,  
242 representing a significant enrichment of biologically plausible genes among those prioritised by the  
243 hypothesis-free algorithm (~8-fold more than expected by chance; two-tailed binomial test,  
244  $p=2.3\times 10^{-80}$ ; **Fig. 4B**). Among the consistently assigned genes between both approaches, assignment  
245 of the nearest gene (124 times out of 126,  $X^2$ -test,  $p<2.5\times 10^{-45}$ ) was the strongest shared factor, as  
246 might be expected, followed by being (or in LD with) a missense variant ( $R^2>0.8$ , 30 times out of 126,  
247  $X^2$ -test,  $p<1.3\times 10^{-07}$ ) and only a minor contribution of eQTL data (20 times out of 126,  $X^2$ -test,  
248  $p<0.001$ ). Over 70% of genetically prioritized genes were enzymes or transporters (**Fig. 4C**).  
249 Inconsistencies between the approaches might be explained by non-consideration of information on  
250 biological pathways in the hypothesis-free genetic approach, as well as variants acting more distal to  
251 the biological determinants of plasma metabolite levels not being considered in the knowledge-  
252 based approach. The missense variant rs1260326 within *GCKR*, for example, colocalised with 49  
253 metabolites across diverse biochemical classes (**Supplemental Fig. S1**) and likely confers its effects on  
254 glucose metabolism through impaired inhibition of glucokinase by glucokinase regulatory protein  
255 and might hence be considered as putative causal candidate by the knowledge-driven approach for  
256 plasma glucose only. However, impairments in glucose metabolism result in numerous downstream  
257 consequences including more distal metabolic branches such as amino acid and lipid metabolism.

258 In addition to being enriched in genes previously implicated in the biology of these metabolites,  
259 the genetically prioritized genes were also enriched in genes known for mutations to cause rare

260 inborn errors of metabolism (IEMs), i.e. monogenic defects in the metabolism of small molecules  
 261 with very specific metabolite changes (**Fig. 4B**).

262

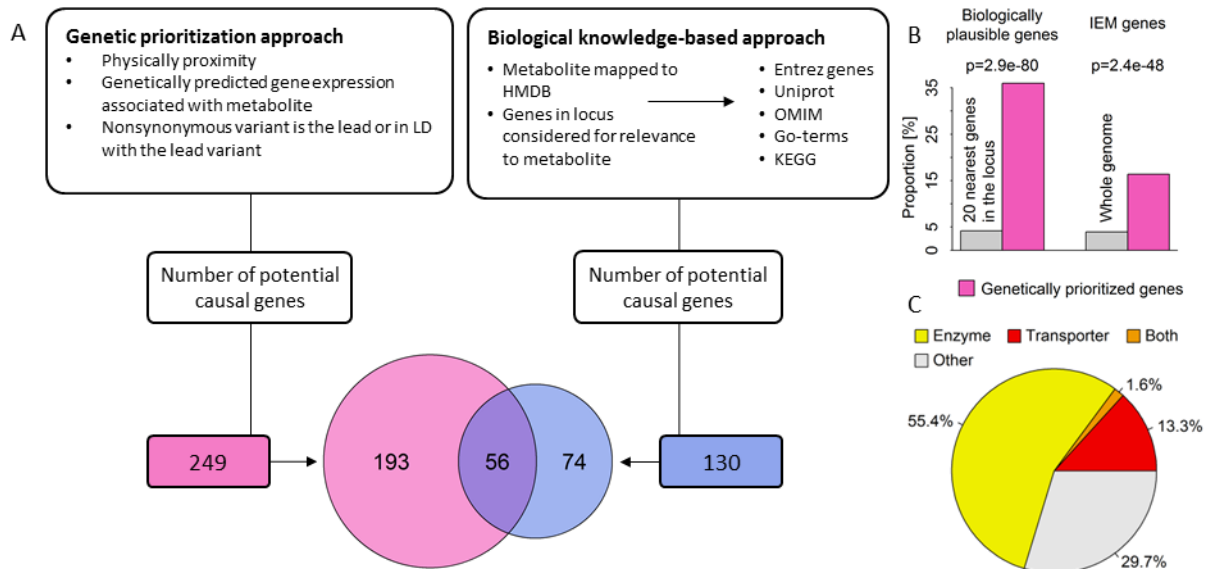

263

264 **Figure 4A** Comparison between the hypothesis-free genetically prioritized versus biologically plausible approaches used in  
 265 the present study to assign candidate genes to metabolite associated single nucleotide polymorphisms. The Venn-diagram  
 266 displays the overlap between both approaches. **B** Enrichment of genetically prioritized genes among biologically plausible  
 267 or genes linked to inborn errors of metabolism (IEM). **C** Proportion of genetically prioritized genes encoding for either  
 268 enzymes or transporters.

269

270 Integrating GWAS statistics across cohorts and platforms allowed us to identify three genes that  
 271 have never been associated with any metabolite level so far. At the *CERS6* locus, rs4143279  
 272 associates with levels of sphingomyelin (d18:1/16:0) ( $p = 4.2 \times 10^{-10}$ ). *CERS6* encodes a ceramide  
 273 synthase facilitating formation of ceramide, a precursor of sphingomyelins<sup>17</sup>. At the *ASNS* locus,  
 274 rs17345286 associates with levels of asparagine ( $p = 4.7 \times 10^{-20}$ ). The lead variant is in high LD ( $R^2=1$ )  
 275 with a missense mutation in *ASNS* (rs1049674, p.Val210Glu). *ASNS* encodes an asparagine  
 276 synthase<sup>18</sup>. Finally, at the *SLC43A1* locus, rs2649667 associates with levels of phenylalanine ( $p =$   
 277  $3.6 \times 10^{-13}$ ). *SLC43A1* encodes a liver-enriched transporter of large neutral amino acids, including  
 278 phenylalanine<sup>19</sup>.

279 *Insights into the causes of common and rare diseases from metabolite-associated loci*

280 The phenotypic consequences of metabolite-associated variants are currently not well  
 281 characterized. Below, we investigate the contribution of individual loci and polygenic predisposition  
 282 associated with differences in metabolite levels to the risk of common and rare diseases.

283 *A citrulline-raising functional variant in GLP2R increases type 2 diabetes risk*

284 Because several of the metabolites captured in this GWAS have been associated with incident  
285 type 2 diabetes (T2D), we sought to investigate whether the association between metabolite-  
286 associated loci and diabetes could provide insights into underlying pathophysiologic mechanisms.  
287 Using estimates of effect for association with T2D based on a meta-analysis of 80,983 cases and  
288 842,909 controls (see **Methods**), we observed a significant enrichment for associations with type 2  
289 diabetes ( $p\text{-value}=2.8\times 10^{-7}$ ) of metabolite-associated variants compared to a matched control set of  
290 variants (**Fig. 5A**).

291 Amongst the diabetes- and metabolite-associated loci was a missense p.Asp470Asn  
292 (rs17681684) variant in the *GLP2R* gene encoding the receptor for glucagon-like peptide 2, a 33  
293 amino acid peptide hormone encoded by the proglucagon gene (*GCG*) that stimulates the growth of  
294 intestinal tissue. Common variants at *GLP2R* are associated with an increased risk of T2D<sup>20</sup>. The  
295 previously reported lead variant for T2D (rs78761021) is in high LD ( $r^2>0.87$ ) with our lead citrulline  
296 association signal at *GLP2R* (rs17681684), which was associated with a 4% higher type 2 diabetes risk  
297 (per-allele odds ratio, 1.04; 95% confidence interval, 1.02, 1.05;  $p=1.1\times 10^{-08}$ ), comparable to  
298 previous reports<sup>20</sup>. Considering eleven phenotypes related to glucose homeostasis and metabolic  
299 health<sup>21-23</sup>, the A-allele of rs17681684 was significantly associated with insulin disposition index  
300 ( $\beta=-0.067$ ,  $p<0.002$ )<sup>22</sup>, corrected insulin response ( $\beta=-0.061$ ,  $p<0.004$ )<sup>22</sup>, glycated haemoglobin  
301 1c (HbA1c) ( $\beta=0.006$ ,  $p<0.0003$ )<sup>21</sup>, and body mass index ( $\beta=0.010$ ,  $p<5.3\times 10^{-9}$ ), in addition to  
302 the previously reported positive association with fasting glucose-dependent insulintropic peptide  
303 (GIP) and the suggestive inverse association with post-glucose load GLP-1 ( $\beta=-0.035$ ,  $p<4.6\times 10^{-4}$ )<sup>24</sup>.  
304 While sample sizes and hence significance levels for insulin traits were not sufficient to support  
305 formal colocalisation analysis, we still obtained a high posterior probability ( $PP>75\%$ ) for a shared  
306 genetic signal across plasma citrulline, T2D risk, body mass index, and fasting levels of GIP (**Fig. 5B**).  
307 We noted, that the *GLP2R* p.Asp470Asn variant was the only of 6 independent genome-wide  
308 significant citrulline-raising loci that was associated with a higher risk of T2D, which indicates that  
309 the association does not reflect a general effect of blood citrulline levels on T2D risk but rather a  
310 locus-specific association at *GLP2R* (**Fig. 5C**). Plasma citrulline levels have been shown to reflect the  
311 volume of intestinal cells and are a marker of *GLP2R* target engagement in the treatment of short-  
312 bowel syndrome with glucagon-like peptide 2 analogues<sup>25</sup>. Taken together, this suggests that  
313 genetically higher *GLP2R* signalling, indicated by the higher citrulline levels among *GLP2R* 470Asn  
314 carriers, may lead to chronically elevated GIP (though increased enteroendocrine mass and number  
315 of GIP-secreting K-cells), which has been shown to downregulate GIP receptors on pancreatic beta  
316 cells<sup>26</sup>, thereby contributing to the observed reduction in the insulin secretory response and increase  
317 in T2D risk.

318 G-protein coupled receptors like GLP2R may signal via G-protein-dependent cyclic adenosine  
 319 monophosphate (cAMP) production or via G-protein-independent beta-arrestin mediated  
 320 signalling<sup>27</sup>. To investigate if the *GLP2R* p.Asp470Asn variant affects signalling via either of these  
 321 pathways, we expressed the *GLP2R* p.Asp470Asn variant in different *in vitro* models (see **Methods**).  
 322 We show that the variant allele is significantly associated with reduced recruitment of beta-arrestin  
 323 to GLP2R upon glucagon-like peptide 2 stimulation, but not with cAMP signalling, which suggests a  
 324 potential role for impaired beta-arrestin recruitment to GLP2R in the pathophysiology of type 2  
 325 diabetes (**Fig. 5E-G**).  
 326

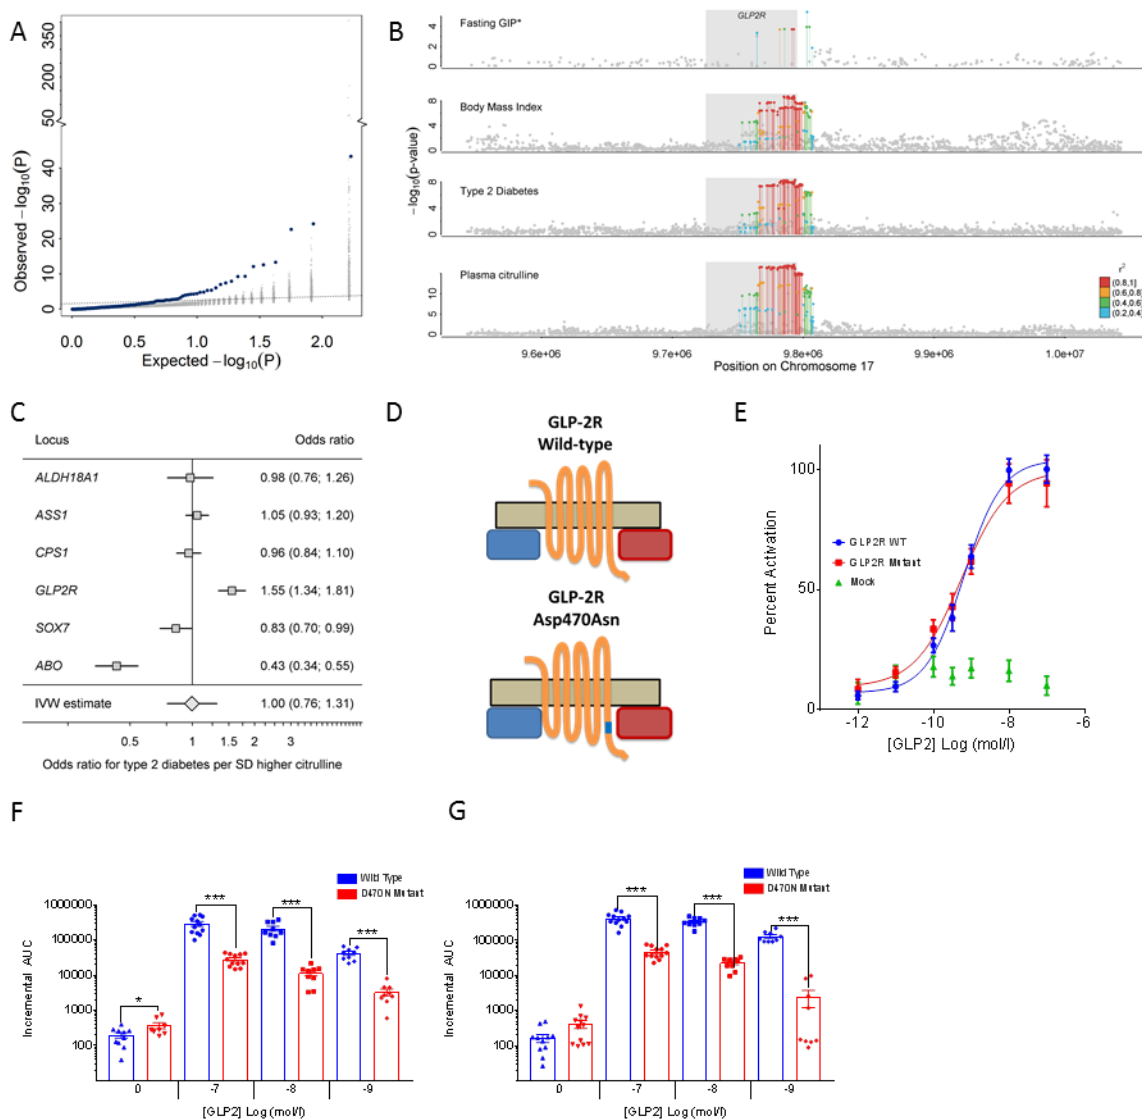

327

328 **Figure 5A** Enrichment of associations with type 2 diabetes (T2D: 80,983 cases, 842,909 controls) among metabolite-  
 329 associated SNPs. Blue dots indicate metabolite-SNPs and grey dots indicate a random selection of matched control SNPs.  
 330 **B** Regional association plots for plasma citrulline, type 2 diabetes, body mass index, and fasting levels of glucose-  
 331 dependent insulinotropic peptide (GIP) focussing on the *GLP2R* gene. Variants are coloured based on linkage disequilibrium  
 332 with the lead variant (rs17681684) for plasma citrulline. \*Summary statistics for GIP were obtained from the more densely

333 genotyped study included in Almgren et al.<sup>24</sup> (to increase coverage of genetic variants for multi-trait colocalisation). **C**  
334 Individual association summary statistics for all citrulline associated SNPs (coded by the citrulline increasing allele) for T2D  
335 and an inverse-variance weighted (IVW) estimate pooling all effects. **D** Schematic sketch for the location of the missense  
336 variant induces amino acid substitution in the glucagon-like peptide-2 receptor (GLP2R). **E** GLP-2 dose response curves in  
337 cAMP assay for GLP2R wild-type and mutant receptors. The dose response curves of cAMP stimulation by GLP-2 in CHO K1  
338 cells transiently transfected with either GLP2R wild-type or mutant constructs. Data were normalised to the wild-type  
339 maximal and minimal response, with 100% being GLP-2 maximal stimulation of the wild-type GLP2R, and 0% being wild-  
340 type GLP2R cells with buffer only. Mean  $\pm$  standard errors are presented (n=4). **F-G** Summary of wild-type and mutant  
341 GLP2R beta-arrestin 1 and beta-arrestin 2 responses. Area under the curve (AUC) summary data (n=3-4) displayed for beta-  
342 arrestin 1 recruitment (E) and beta-arrestin 2 recruitment (F). AUCs were calculated using the 5 minutes prior to ligand  
343 addition as the baseline value. Mean  $\pm$  standard errors are presented. Normal distribution of log<sub>10</sub> transformed data was  
344 determined by the D'Agostino & Pearson normality test. Following this statistical significance was assessed by one-way  
345 ANOVA with post hoc Bonferroni test. \*\*\*p<0.001, \*p<0.05.

346

### 347 *Serine and glycine levels play a critical role in the aetiology of a rare eye disease*

348 A recent GWAS of macular telangiectasia type 2 (MacTel), a rare neurovascular degenerative  
349 retinal disease, identified three genome-wide susceptibility loci (*PHGDH*, *CPS1*, and *TMEM161B-  
350 LINC00461*) of which the same variants at *PHGDH* and *CPS1* were associated with levels of the amino  
351 acids serine and glycine in this GWAS<sup>28</sup>. More recently, it was shown that low serine availability is  
352 linked to both MacTel as well as hereditary sensory and autonomic neuropathy type 1 through  
353 elevated levels of atypical deoxyshingolipids<sup>29</sup>. Whether genetic predisposition to low serine and  
354 glycine levels affects MacTel more generally or has predictive utility has not been investigated. To  
355 test this and to explore the specificity of associations between genetic influences on metabolite  
356 levels and the risk of MacTel, we generated genetic scores (GS) using the sentinel variants for each  
357 of the 141 metabolites with at least one significantly associated locus identified in this GWAS and  
358 tested their associations with the risk of MacTel. GS's for serine and glycine were the only scores  
359 associated with risk for MacTel after removal of the known highly pleiotropic *GCKR* variant (**Fig. 6A**).  
360 Each standard deviation higher serine levels via the serine GS was associated with a 95% lower risk  
361 of MacTel (odds ratio (95% confidence interval), 0.05 (0.03-0.08);  $p=9.5 \times 10^{-30}$ ; **Fig. 6A**). Each of five  
362 serine associated variants was individually associated with lower MacTel risk, with a clear dose-  
363 response relationship and no evidence of heterogeneity (**Fig. 6B**). The association was unchanged  
364 when removing the *GCKR* locus. To disentangle the effect of these two highly correlated metabolites  
365 on MacTel risk, we used multivariable Mendelian randomization analysis, which allowed us to test  
366 for a causal effect of both measures simultaneously. In this analysis, the effect of serine remained  
367 strong, while the effect of glycine was attenuated (**Tab. 2**). Glycine and serine can be interconverted  
368 and these results provide genetic evidence that the link between glycine and MacTel is via serine  
369 levels through glycine conversion. This hypothesis is supported by the evidence of a log-linear  
370 relationship between associations with serine and risk of MacTel among glycine-associated variants  
371 (**Fig. 6B**). These findings provide strong evidence that pathways indexed by genetically higher serine  
372 levels are strongly and causally associated with protection against MacTel.

373 Given the large observed effect size, we estimated whether using serine and glycine-associated  
 374 loci might improve the prediction of this rare disease. Adding genetically predicted glycine and  
 375 serine levels, based on newly discovered metabolite instruments from the present study and  
 376 previous MacTel variants linked to glycine and serine metabolism, substantially improved prediction  
 377 of MacTel based on an area under the receiver operating characteristic curve from 0.65 (CI 95%:  
 378 0.626-0.682) to 0.73 (0.702-0.753) (**Fig. 6**).

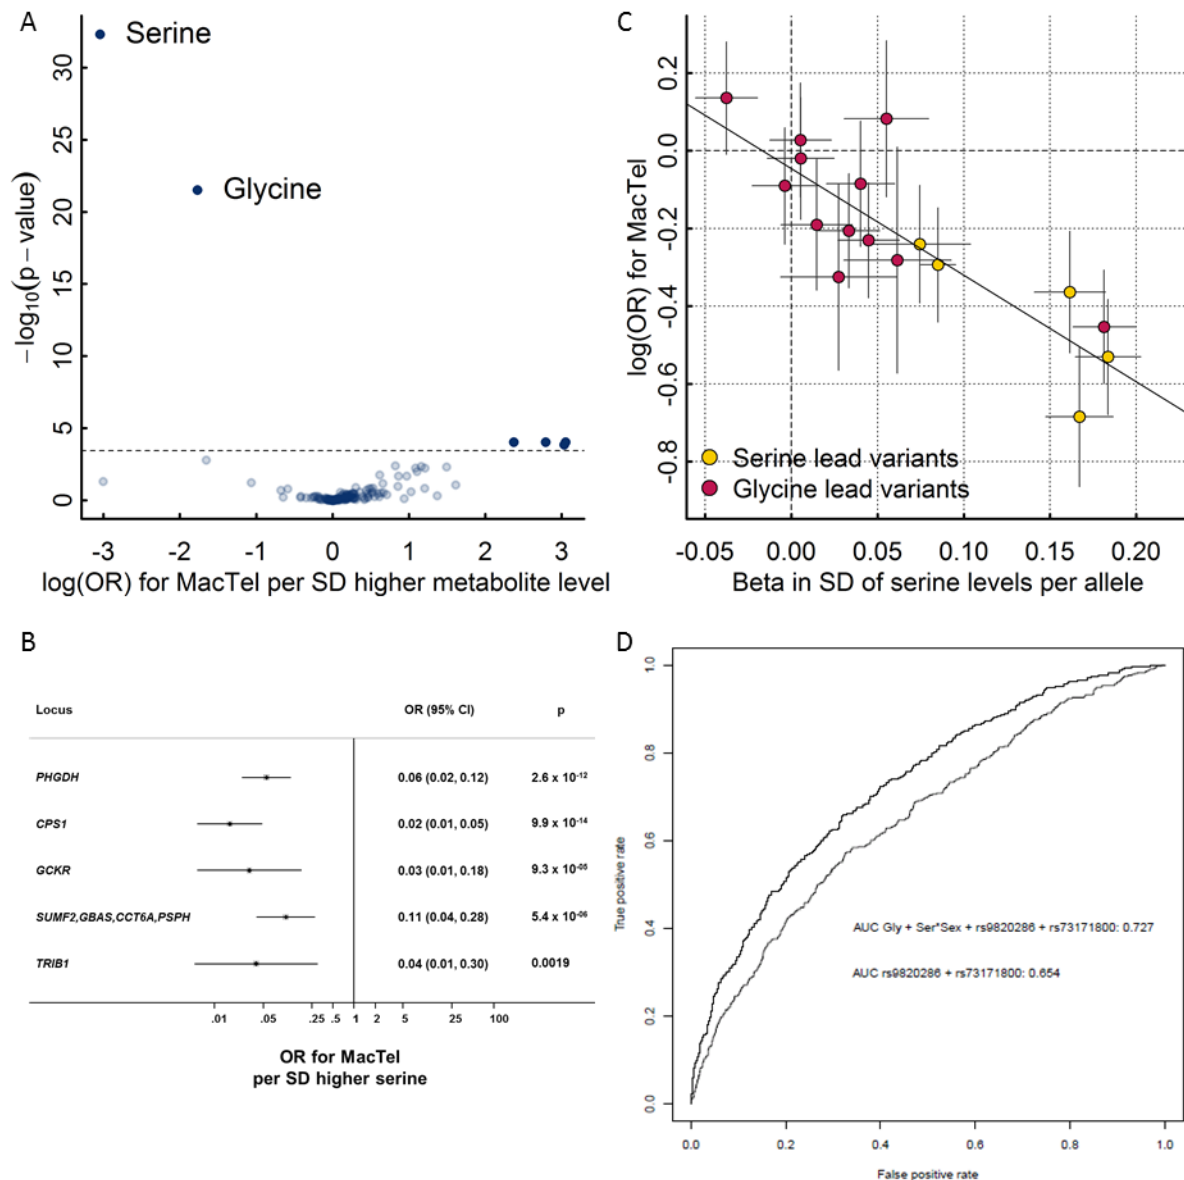

379

380 **Figure 6A** Results from genetic scores for each metabolite on risk for macular telangiectasia type 2 (MacTel). The dotted  
 381 line indicates the level of significance after correction for multiple testing. The inset shows the same results but after  
 382 dropping the pleiotropic variants in *GCKR* and *FADS1-2*. **B** Effect estimates of serine-associated genetic variants on the risk  
 383 for MacTel. **C** Comparison of effect sizes for lead variants associated with plasma serine levels and the risk for MacTel. **D**  
 384 Receiver operating characteristic curves (ROC) comparing the discriminative performance for MacTel using a) sex, the first  
 385 genetic principal component, and two MacTel variants (*rs73171800* and *rs9820286*) not associated with metabolite levels,  
 386 and b) additionally including genetically predicted serine and glycine at individual levels as described in the methods. The  
 387 area under the curve (AUC) is given in the legend.



388 *Common variation at inborn error of metabolism (IEM) associated genes influences the risk of*  
389 *common manifestations of diseases related to the phenotypic presentation of those IEMs*

390 In his seminal 1902 work on alkaptonuria<sup>30</sup>, also known as dark or black urine disease, Archibald  
391 Garrod was the first to hypothesise that inborn errors of metabolism are “extreme examples of  
392 variations of chemical behaviour which are probably everywhere present in minor degrees”.  
393 Previous studies have shown enrichment of metabolite quantitative trait loci in genes known to  
394 cause IEMs<sup>31</sup>. Whether or not common variants at IEM causing loci translate into clinically manifest  
395 disease remains unknown. The identification of several metabolite-associated variants at IEM-linked  
396 genes in this GWAS meta-analysis allows an investigation of the health consequences of genetically  
397 determined differences in metabolism for more frequently occurring variants, representing  
398 potentially milder forms of the metabolic and other clinical symptoms of IEMs, and providing new  
399 candidate genes for rare extreme metabolic disorders that currently lack a genetic basis (**Fig. 7A**). In  
400 this study, there were 153 locus-metabolite associations for which 53 unique IEM-associated genes  
401 were prioritized as likely causal using either the hypothesis-free genetic approach or the knowledge-  
402 based approach on the basis of the Orphanet database<sup>32</sup>. In 89% of these associations (136 of 153)  
403 the metabolite associated with a given GWAS locus perfectly matched, or was closely related to, the  
404 metabolite affected in patients with the corresponding IEM (**Fig. 7B**).

405 To test whether IEM-mirroring lead variants from our metabolite GWAS may increase the risk of  
406 common manifestations of diseases known to exist in patients with the corresponding IEM (**Fig. 7A**)  
407 we obtained a list of electronic health record diagnosis codes (International Statistical Classification  
408 of Diseases and Related Health Problems 10th Revision [ICD-10]) and mapped those based on  
409 symptoms seen in both, IEM patients and patients with common, complex disease manifestations  
410 (see **Methods**). We identified 93 ICD-10 codes with at least 500 cases within the UK Biobank study  
411 that aligned with the symptoms or presentations seen in patients with IEMs caused by mutations in  
412 genes specifically associated with metabolites observed in the present study. We obtained the  
413 association statistics of 85 unique metabolite-associated lead variants at the 136 locus-metabolite  
414 associations with these 93 clinical diagnoses and observed 36 associations that met statistical  
415 significance (false discovery rate < 5%, **Supplemental Table S6 and Fig. 7B**). For 15 out of those we  
416 obtained strong evidence of a shared genetic metabolite-phenotype signal using colocalisation  
417 analyses (posterior probability of a shared signal >80%; **Fig. 7D and Supplemental Fig. S3**). These  
418 instances linked common genetic variants in or near *APOE*, *PCSK9*, *LPL*, and *LDLR* associated with  
419 sphingomyelins (SM 16:0, SM 18:0, and SM-OH 24:1) with atherosclerotic heart disease diagnosis  
420 codes (I21, I25), mirroring what is observed in rare familial forms of dyslipidaemia in which these  
421 sphingomyelins are elevated and the risk of ischemic heart disease is greatly increased<sup>33,34</sup>. These

422 results provide further evidence that common variation at IEM genes can lead to clinical phenotypes  
 423 and diseases that correspond to those that patients with rare mutations in those same genes are  
 424 severely affected by. Further studies with detailed follow-up for specific outcomes may provide  
 425 greater power and help clarify the medical consequences of genetic differences in metabolism  
 426 caused by metabolite altering variants in the general population.

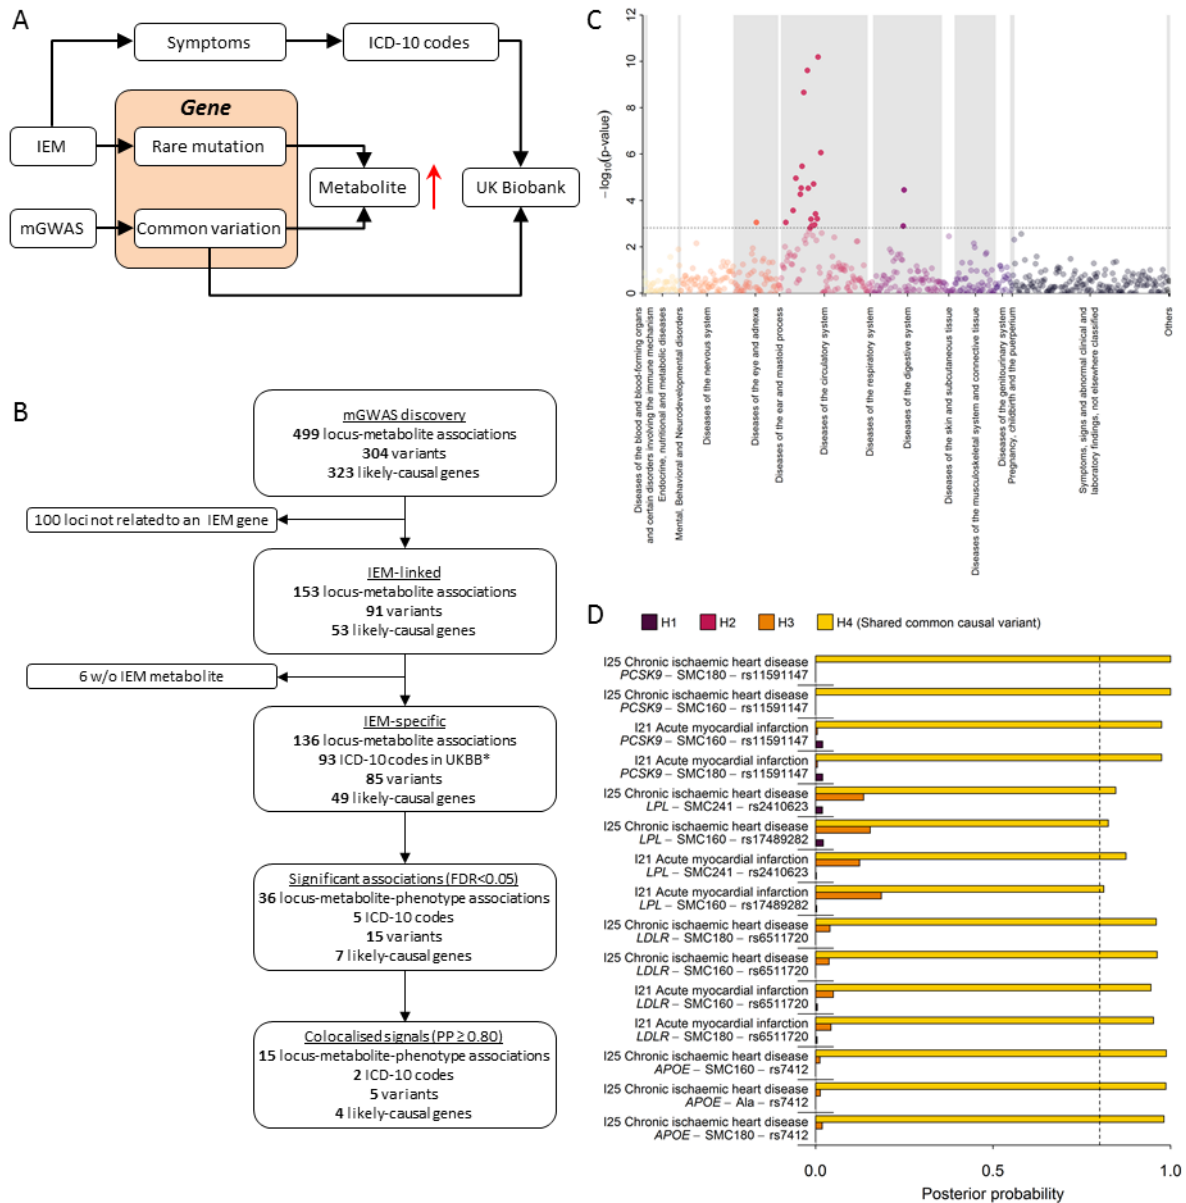

427

428 **Figure 7A** Scheme of the workflow to link common variation in genes causing inborn errors of metabolism (IEM) to  
 429 complex diseases. **7B** Flowchart for the systematic identification of metabolite-associated variants to genes and diseases  
 430 related to inborn errors of metabolism (IEM). **C** P-values from genome-wide association studies among UK Biobank using  
 431 variants mapping to genes known to cause IEMs and binary outcomes classified with the ICD-10 code. Colours indicate  
 432 disease classes. The dotted line indicates the significance threshold controlling the false discovery rate at 5%. **D** Posterior  
 433 probabilities (PPs) from statistical colocalisation analysis for each significant triplet consisting of a metabolite, a variant,  
 434 and a ICD-10 code among UK Biobank. The dotted line indicates high likelihood (>80%) for one of the four hypothesis  
 435 tested: H0 – no signal; H1 – signal unique to the metabolite; H2 – signal unique to the trait; H3 – two distinct causal  
 436 variants in the same locus and H4 – presence of a shared causal variant between a metabolite and a given trait.

437

## 438 Discussion

439 This large-scale genome-wide meta-analysis has integrated genetic associations for 174  
440 metabolites across different measurement platforms, an approach that has resulted in a three-fold  
441 increase in our knowledge of genetic loci regulating levels of these metabolites. We assign likely  
442 causal genes for many of the identified associations using a dual approach that combined automated  
443 database mining with manual curation.

444 Previous platform-specific genetic studies of blood metabolites have been substantially smaller  
445 in size due to being restricted to a single platform and/ or study<sup>2-10</sup>. We build on these earlier studies  
446 to identify and demonstrate enrichment of rare and low-frequency coding variants in enzyme and  
447 transporter genes with large effects and reveal the importance of non-linear associations at several  
448 loci.

449 Our results not only provide detailed insight into the genetic determinants of human  
450 metabolism but consider their relevance for disease aetiology and prediction. We explore both  
451 locus-specific and polygenic score effects and provide tangible examples with clear translational  
452 potential. We discovered a strong link between GLP2R, citrulline metabolism and T2D, and  
453 demonstrate that the p.Asp470Asn variant underlying the citrulline and T2D associations leads to  
454 significantly reduced recruitment of beta-arrestin to GLP2R in various cellular models, providing an  
455 explanation for a possible pathological mechanism of a variant previously predicted to be benign<sup>24</sup>.

456 The finding that a standard deviation increase in serine levels via a genetic score is associated  
457 with 95% lower risk of MacTel shows that genetic differences resulting in very specific metabolic  
458 consequences can have profound effects on health. Our results suggest that inclusion of genetic  
459 scores for metabolite levels can improve identification of high risk individuals. Serine and glycine  
460 supplementation and/ or pharmacologic modulation of serine metabolism may help to reduce  
461 development or alter the prognosis of this rare, severe eye disease, specifically if targeted to people  
462 genetically with a genetic susceptibility to low serine levels. It is important to note, that randomized  
463 control trials are needed testing this hypothesis before any recommendations on supplementations  
464 could be made.

465 We finally show specific examples where common genetic variation in IEM-related genes is  
466 associated with phenotypes that are also caused by rare highly penetrant mutations. These results  
467 suggest that rare variants in metabolite regulating genes newly identified in our study may be  
468 valuable candidate genes in patients without a genetic diagnosis but severe alterations in the  
469 corresponding or related metabolites. Hence these results provide a new starting point for further  
470 investigations into the relationships between human metabolism and common and rare disorders.

## 471 **Methods**

### 472 **Study design and participating cohorts**

473 We performed genome-wide meta-analyses of the levels of 174 metabolites from 7 biochemical  
474 categories (amino acids, biogenic amines, acylcarnitines, phosphatidylcholines,  
475 lysophosphatidylcholines, sphingomyelins, and sum of hexoses) captured by the Biocrates p180 kit  
476 measured using mass spectrometry (MS). As described in more detail below, a total of 174  
477 metabolites were successfully measured in up to 9,363 plasma samples from genotyped participants  
478 of the Fenland study<sup>35</sup>.

479 To maximise sample size and power, we meta-analysed genome-wide association (GWAS)  
480 results from the Fenland cohort with those run in the EPIC-Norfolk<sup>36</sup> and INTERVAL<sup>37</sup> studies, in  
481 which metabolites were profiled using MS (Metabolon Discovery HD4 platform) or protein nuclear  
482 magnetic resonance (<sup>1</sup>H-NMR) spectrometry<sup>3839</sup> (**Supplementary Tab. 1**). Ten of the 174 Biocrates  
483 metabolites were covered across all platforms, while 38 were available on the Biocrates and  
484 Metabolon platforms and 126 were unique to Biocrates (**Fig. 1**). We integrated publicly available  
485 summary statistics from genome-wide meta-analyses of the same metabolites measured using MS  
486 (with Biocrates or Metabolon platforms) or <sup>1</sup>H-NMR spectrometry (**Supplementary Tab. 1**).  
487 Metabolites were matched across platforms by comparing metabolite names and biochemical  
488 formulas. Mapping across different Metabolon platforms was done based on retention time/index  
489 (RI), mass to charge ratio (m/z), and chromatographic data (including MS/MS spectral data).  
490 Scientists at Metabolon Inc. independently reviewed and confirmed metabolite matches.

491 A summary of the characteristics of participating cohorts is given in **Supplemental Table S1**. The  
492 Fenland study is a population-based cohort study of 12,435 participants without diabetes born  
493 between 1950 and 1975<sup>35</sup>. Participants were recruited from general practice surgeries in Cambridge,  
494 Ely and Wisbech (United Kingdom) and underwent detailed metabolic phenotyping and genome-  
495 wide genotyping. Ethical approval for the Fenland study was given by the Cambridge Local Ethics  
496 committee (ref. 04/Q0108/19) and all participants gave their written consent prior to entering the  
497 study. The European Prospective Investigation of Cancer (EPIC)-Norfolk study is a prospective cohort  
498 of 25,639 individuals aged between 40 and 79 and living in the county of Norfolk in the United  
499 Kingdom at recruitment<sup>36</sup>. The study was approved by the Norfolk Research Ethics Committee (REC  
500 ref. 98CN01) and all participants gave their written consent before entering the study. INTERVAL is a  
501 randomised trial of approximately 50,000 whole blood donors enrolled from all 25 static centres of  
502 NHS Blood and Transplant, aiming to determine whether donation intervals can be safely and  
503 acceptably decreased to optimise blood supply whilst maintaining the health of donors<sup>37</sup>. All

504 participants of the study gave written informed consent and the study was approved by NRES  
505 Committee East of England - Cambridge East (ref. 11/EE/0538).

## 506 **Metabolomics measurements**

507 The levels of 174 metabolites were measured in the Fenland study by the AbsoluteIDQ®  
508 Biocrates p180 Kit (Biocrates Life Sciences AG, Innsbruck, Austria) as reported elsewhere in  
509 detail<sup>39,40</sup>. We used a Waters Acquity ultra-performance liquid chromatography (UPLC; Waters Ltd,  
510 Manchester, UK) system coupled to an ABSciex 5500 Qtrap mass spectrometer (Sciex Ltd,  
511 Warrington, UK). Samples were derivatised and extracted using a Hamilton STAR liquid handling  
512 station (Hamilton Robotics Ltd, Birmingham, UK). Flow injection analysis coupled with tandem mass  
513 spectrometry (FIA-MS/MS) using multiple reaction monitoring (MRM) in positive mode ionisation  
514 was performed to measure the relative levels of acylcarnitines, phosphatidylcholines,  
515 lysophosphatidylcholines and sphingolipids. The level of hexose was measured in negative ionisation  
516 mode. Ultra-performance liquid chromatography coupled with tandem mass spectrometry using  
517 MRM was performed to measure the concentration of amino acids and biogenic amines. The  
518 chromatography consisted of a 5-minute gradient starting at 100% aqueous (0.2% Formic acid)  
519 increasing to 95% acetonitrile (0.2% Formic acid) over a Waters Acquity UPLC BEH C18 column (2.1 x  
520 50 mm, 1.7 µm, with guard column). Isotopically labelled internal standards are integrated within  
521 the Biocrates p180 Kit for quantification. Data was processed in the Biocrates Met/IDQ software. Raw  
522 metabolite readings underwent extensive quality control procedures. Firstly, we excluded from any  
523 further analysis metabolites for which the number of measurements below the limit of  
524 quantification (LOQ) exceeded 5% of measured samples. Excluded metabolites were carnosine,  
525 dopamine, putrescine, asymmetric dimethyl arginine, dihydroxyphenylalanine, nitrotyrosine,  
526 spermine, sphingomyelins SM(22:3), SM(26:0), SM(26:1), SM(24:1-OH), phosphatidylcholine acyl-  
527 alky 44:4, and phosphatidylcholine diacyl C30:2. Secondly, in samples with detectable but not  
528 quantifiable peaks, we assigned random values between 0 and the run-specific LOQ of a given  
529 metabolite. Finally, we corrected for batch-effects with a “location-scale” approach, i.e. with  
530 normalization for mean and standard deviation of batches.

531 The levels of up to 38 metabolites were measured in EPIC-Norfolk and INTERVAL using the  
532 Metabolon HD4 Discovery platform. Measurements were carried out using MS/MS instruments. For  
533 these measurements, instrument variability, determined by calculating the median relative standard  
534 deviation, was of 6%. Data Extraction and Compound Identification: raw data was extracted, peak-  
535 identified and quality control-processed using Metabolon’s hardware and software. Compounds  
536 were identified by comparison to library entries of purified standards or recurrent unknown entities.  
537 Metabolon maintains a library, based upon authenticated standards, that contains the retention

538 time/index (RI), mass to charge ratio (m/z), and chromatographic data (including MS/MS spectral  
539 data) of all molecules present in the library. Identifications were based on three criteria: retention  
540 index, accurate mass match to the library +/- 10 ppm, and the MS/MS forward and reverse scores  
541 between the experimental data and authentic standards. Metabolite Quantification and Data  
542 Normalization: Peaks were quantified using area-under-the-curve. A data normalization step was  
543 performed to correct variation resulting from instrument inter-day tuning differences. Essentially,  
544 each compound was corrected in run-day blocks by registering the medians to equal one (1.00) and  
545 normalizing each data point proportionately (termed the “block correction”).

546 The serum levels of 230 metabolites were measured in the INTERVAL study using <sup>1</sup>H-NMR  
547 spectroscopy<sup>38,41</sup>. Among those, 10 metabolites (creatinine, alanine, glutamine, glycine, histidine,  
548 isoleucine, leucine, valine, phenylalanine, and tyrosine) overlapped with what is captured by the  
549 Biocrates p180 Kit and were used in the present study. Further details of the <sup>1</sup>H-NMR spectroscopy,  
550 quantification data analysis and identification of the metabolites have been described previously<sup>38,42</sup>.  
551 Participants with >30% of metabolite measures missing and duplicated individuals were removed.  
552 Metabolite data more than 10 SD from the mean was also removed.

### 553 **GWAS and meta-analysis**

554 In Fenland and EPIC-Norfolk, metabolite levels were natural log-transformed, winsorised to  
555 five standard deviations and then standardised to a mean of 0 and a standard deviation of 1.  
556 Genotypes were measured using Affymetrix Axiom or Affymetrix SNP5.0 genotyping arrays. In brief,  
557 genotyping in Fenland was done in two waves including 1,500 (Affymetrix SNP5.0) and 9,369  
558 (Affymetrix Axiom) participants and imputation was done using IMPUTE2 to 1000 Genomes Phase  
559 1v3 (Affymetrix SNP5.0) or phase 3 (Affymetrix Axiom) reference panels (**Supplemental Tab. S1**).  
560 Plasma metabolite and genotype data was available for 8,714 (Affymetrix Axiom) and 1,022  
561 (Affymetrix SNP5.0) unrelated individuals. In EPIC-Norfolk, 21,044 samples were forwarded to  
562 imputation using 1000 Genomes Phase 3 (Oct. 2014) reference panels (**Supplemental Tab. S1**).  
563 Imputed SNPs with imputation quality score less than 0.3 or minor allele account less than 2 were  
564 removed from the imputed dataset. Genome-wide association analyses were carried out using BOLT-  
565 LMM v2.2 adjusting for age, sex, and study-specific covariates in mixed linear models. Alternatively  
566 (when the BOLT-LMM algorithm failed due to heritability estimates close to zero or one) analyses  
567 were performed using SNPTTEST v2.4.1 in linear regression models, additionally adjusting for the top  
568 4 genetic ancestry principal components and excluding related individuals (defined by proportion  
569 identity-by-descent calculated in Plink<sup>43</sup> > 0.1875 as recommended<sup>44</sup>). GWAS analyses in Fenland  
570 were performed within genotyping chip, and associations meta-analysed.



571 In INTERVAL, genotyping was conducted using the Affymetrix Axiom genotyping array. Standard  
572 quality control procedures were conducted prior to imputation. The data were phased and imputed  
573 to a joint 1000 Genomes Phase 3 (May 2013)-UK10K reference imputation panel. After QC, a total of  
574 40,905 participant remained with data obtained by <sup>1</sup>H-NMR spectroscopy. For variants with a MAF  
575 of >1% and imputed variants with an info score of >0.4 a univariate GWAS for each of the ten  
576 metabolic measures was conducted, after adjustment for technical and seasonal effects, including  
577 age, sex, and the first 10 principal components, and rank-based inverse normal transformation. The  
578 association analyses were performed using BOLT-LMM v2.2 and R. Data based on the Metabolon  
579 HD4 platform was available for 8,455 participants. Prior to the Metabolon HD4 genetic analysis,  
580 genetic data were filtered to include only variants with a MAF of >0.01% and imputed variants with  
581 an info score of >0.3. Phenotype residuals corrected for age, gender, metabolon batch, INTERVAL  
582 centre, plate number, appointment month, the lag time between the blood donation appointment  
583 and sample processing, and the first 5 ancestry principal components were calculated for each  
584 metabolite and the residuals were standardised prior to the genetic analyses in SNPTTEST v2.5.1.

585 For all GWAS analysis within Fenland, EPIC-Norfolk and INTERVAL, variants with Hardy-  
586 Weinberg equilibrium  $p < 1 \times 10^{-6}$  and associations with absolute value of effect size >5 or standard  
587 error (SE) >10 or <0 were excluded; insertions and deletions were excluded.

588 For each metabolite, we performed a meta-analysis of z-scores (betas divided by standard  
589 errors) as a measure of association, signals and loci (see below), using METAL software.  
590 Heterogeneity between studies for each association was estimated by Cochran's Q-test. For each  
591 metabolite, we also performed a meta-analysis of beta and standard errors for the subset of studies  
592 (Fenland and, when available, EPIC-Norfolk and/or INTERVAL) where we had access to individual  
593 level data and standardised phenotype preparation to estimate effect sizes. Quality filters  
594 implemented after meta-analysis included exclusion of SNPs not captured by at least 50% of the  
595 participating studies and 50% of the maximum sample size for that metabolite and variants with a  
596 minor allele frequency below 0.5%. As a result, meta-analyses assessed the associations of up to  
597 13.1 million common or low-frequency autosomal SNPs. Chromosome and base pair positions are  
598 determined referring to GRCh37 annotation. To define associations between genetic variants and  
599 metabolites, we corrected the conventional threshold of genome wide significance for 102 tests (i.e.  
600  $p < 4.9 \times 10^{-10}$ ), corresponding to the number of principal components explaining 95% of the variance  
601 of the 174 metabolites in the Fenland cohort, as previously described<sup>45</sup>.

602

603

## 604 **Signal selection**

605 For each metabolite, we ranked associated SNPs ( $p < 4.9 \times 10^{-10}$ ) by z-score to select trait-sentinel  
606 SNPs and defined an “association” region as the region extending 1 Mb to each side of the trait-  
607 sentinel SNP. During forward selection of trait-sentinel SNPs and loci for each trait, adjacent and  
608 partially overlapping association regions were merged by extending region boundaries to a further 1  
609 Mb. After defining trait-sentinel SNPs and association regions we defined overall lead-sentinel SNP  
610 and loci for any metabolite using a similar approach. Trait-sentinel SNPs were sorted by z-score for  
611 the forward selection of lead-sentinel SNPs and a “locus” was defined as the region extending 1 Mb  
612 each side of the lead-sentinel SNP. Regions larger than 2 Mb defined in the trait-sentinel association  
613 region definition were carried over in the definition of lead-sentinel SNP loci. As a result, all lead-  
614 sentinel SNPs were >1Mb apart from each other and had very low or no linkage disequilibrium ( $R^2 <$   
615 0.05).

616 For a given locus, independent signals across metabolites were determined based on linkage  
617 disequilibrium (LD)-clumping of SNPs that reached the Bonferroni corrected p-value. SNPs with the  
618 smallest p-values and an  $R^2$  less than 0.05 were identified as independent signals. LD patterns were  
619 estimated with SNP genotype data imputed using the haplotype reference consortium (HRC)  
620 reference panel, with additional variants from the combined UK10K plus 1000 Genomes Phase 3  
621 reference panel in the EPIC-Norfolk study ( $n = 19,254$  after removing ancestry outliers and related  
622 individuals).

623 Throughout the manuscript, the term “locus” indicates a genomic region ( $\geq 1$  Mb each side) of a  
624 lead-sentinel SNP harbouring one or more trait-sentinel SNPs; “signal” indicates a group of trait-  
625 sentinel SNPs in LD with each other but not with other trait-sentinel SNPs in the locus ( $R^2 < 0.05$ );  
626 “association” indicates trait-sentinel SNP to metabolite associations defined by a trait-lead SNP and  
627 its surrounding region ( $\geq 1$  Mb each side).

628 We tested at each locus for conditional independent variants using exact stepwise conditional  
629 analysis in the largest Fenland sample ( $n = 8,714$ ) using SNPTTEST v2.5 with the same baseline  
630 adjustment as in the discovery approach. To refine signals at those loci we used a more recent  
631 imputation for this analysis based on the HRC v1 reference panel and additional SNPs imputed using  
632 UK10K and 1000G phase 3. We defined secondary signals as those with a conditional p-value  $< 5 \times 10^{-8}$ .  
633 To avoid problems with collinearity we tested after each round if inclusion of a new variant  
634 changed associations of all previous variants with the outcome using a joint model. If this model  
635 indicated that one or more of the previously selected variants dropped below the applied  
636 significance threshold we stopped the procedure, otherwise we repeated this procedure until no

637 further variant met the significance threshold in conditional models. We considered only locus–  
638 metabolite associations meeting the GWAS-threshold for significance in the Fenland analysis  
639 (n=228).

#### 640 **Investigation of heterogeneity**

641 We used a meta-regression model to identify factors associated with larger  $I^2$  values across all  
642 499 identified SNP-metabolite associations. To this end, a vector of heterogeneity estimates,  $I^2$ , from  
643 the meta-analysis was obtained as outcome and the following explanatory variables were  
644 considered: strength of effect (absolute Z-score of the SNP – metabolite association), biochemical  
645 class, dummy variables indicating the study of origin (related to the measurement platform), and the  
646 number of contributing studies as an estimate of sample size. A significant effect of any of those  
647 terms in a linear regression model was taken to indicate a source of heterogeneity across SNP-  
648 metabolite associations and hence identified systematic factors contributing to any observed cross-  
649 platform heterogeneity.

#### 650 **Statistical fine-mapping**

651 We used statistical fine mapping to determine 99%-credible intervals for all independently  
652 associated SNPs using the R package ‘corrcoverage’. Briefly, regional summary statistics (betas and  
653 standard errors) were converted to approximate Bayes factors as described in Wakefield *et al.*<sup>46</sup> to  
654 calculate the posterior probability (PP) for each variant driving the association. Credible sets are  
655 subsequently defined as the ranked list of variants cumulatively covering 99% of the PP to cover the  
656 true causal signal. For loci with evidence of independent secondary signals we used GCTA COJO-cond  
657 algorithm to generate conditional association statistics conditioning on all other independent signals  
658 in the locus. Since the calculation of approximate Bayes factors requires betas and standard errors  
659 we used meta-analysis results across studies for which we had access to individual data (Fenland,  
660 EPIC-Norfolk, and INTERVAL). However, out of 546 detected signals 473 reached genome-wide  
661 significance ( $p < 5 \times 10^{-8}$ ) in this smaller subset and we restricted fine-mapping to those associations.

#### 662 **Multi-trait colocalisation across metabolites**

663 We used hypothesis prioritisation in multi-trait colocalisation (HyPrColoc)<sup>15</sup> at each of the  
664 identified 144 loci 1) to identify metabolites sharing a common causal variant over and above what  
665 could be identified in the meta-analysis to increase statistical power, and 2) to identify loci with  
666 evidence of multiple causal variants with distinct associated metabolite clusters. Briefly, HyPrColoc  
667 aims to test the global hypothesis that multiple traits share a common genetic signal at a genomic  
668 location and further uses a clustering algorithm to partition possible clusters of traits with distinct  
669 causal variants within the same genomic region. HyPrColoc provides for each cluster three different

670 types of output: 1) a posterior probability (PP) that all traits in the cluster share a common genetic  
671 signal, 2) a regional association probability, i.e. that all the metabolites share an association with one  
672 or more variants in the region, and 3) the proportion of the PP explained by the candidate variant.  
673 We considered a highly likely alignment of a genetic signal across various traits if the PP > 75% or the  
674 regional association probability > 80% and the PP > 50%. The second criterion takes into account  
675 that metabolites may share multiple causal variants at the same locus. We used the same set of  
676 summary statistics as described for statistical fine-mapping, i.e. based on betas and standard errors  
677 across studies for which we had access to individual level data. We further filtered metabolites with  
678 no evidence of a likely genetic signal ( $p > 10^{-5}$ ) in a region before performing HyPrColoc, which  
679 improved clustering across traits by minimizing noise. We used the same workflow to test for the  
680 alignment of a genetic signal at the *GLPR2* locus using summary statistics from T2D (see below), a  
681 meta-analysis for body mass index across GIANT and UK Biobank, plasma GIP, and plasma citrulline.

### 682 **Testing for non-linear effects**

683 We tested each of the 499 identified SNP (j) – metabolite (i) pairs for the deviation from an  
684 additive linear model by introducing a dummy variable encoding heterozygous carriers (D), i.e. D = 1  
685 if heterozygous and 0 otherwise, in the following regression model:

$$686 \text{Metabolite}_i \sim \beta_1 + \beta_2 * \text{SNP}_j + \beta_3 * D + \dots \text{Confounder} \dots + \epsilon$$

687 A significant estimate  $\beta_3$  indicates departure from linearity. In a more formal framework this test  
688 allows to test for either a dominant negative or positive model of inheritance depending on the  
689 coding of the effect allele. We implemented this test in STATA version 13 using individual level data  
690 from the Fenland cohort.

### 691 **Metabolic network and community detection**

692 We used Gaussian graphical modelling (GGMs) to construct a metabolic network across all 174  
693 metabolites in a data-driven manner<sup>2</sup>. Briefly, GGMs are based on partial correlation minimizing  
694 confounding and have been shown to recover tight biochemical dependencies from single spot  
695 blood measurements. The final network comprised 167 metabolites and 554 significant ( $p < 3.3 \times 10^{-6}$ )  
696 edges. We next performed community detection using the Girvan-Newman algorithm, which  
697 successively removes edges with high edge betweenness creating a dendrogram of splits of the  
698 network into communities, as implemented in the R package *igraph*. We obtained 14 distinct  
699 communities including those covering metabolites of distinct biochemical species as well as  
700 subdividing larger metabolite classes (**Supplemental Fig. S2**).

701

## 702 **Hypothesis-free (genetic) assignment of causal genes**

703 To assign likely causal genes to lead SNPs at each locus we generated a scoring system. We  
704 identified the nearest gene for each variant by querying HaploReg<sup>47</sup>. Next we integrated expression  
705 quantitative trait loci (eQTL) studies (GTEx v6p) to identify genes whose expression levels are  
706 associated with metabolite levels using TWAS/FUSION (Transcriptome-wide association study /  
707 Functional summary-based imputation)<sup>48</sup>. In doing so, we assigned to each variant-metabolite  
708 association one or more associated genes using the variant as common anchor. We further assigned  
709 higher impact for a causal gene if either the metabolite variant itself or a proxy in high linkage  
710 disequilibrium ( $R^2 > 0.8$ ) was a missense variant for a known gene again using the HaploReg database  
711 to obtain relevant information. Based on those three criteria we ranked all possible candidate genes  
712 and kept those with the highest score as putative causal gene.

## 713 **Knowledge-based (biological) assignment of causal genes**

714 Metabolite traits are unique among genetically evaluated phenotypes in that the functional  
715 characterization of the relevant genes has often already been carried out using classic biochemical  
716 techniques. The objective for the knowledge-based assignment strategy was to find the  
717 experimental evidence that has previously linked one of the genes proximal to the GWAS lead  
718 variant to the relevant metabolite. For many loci and metabolites this 'retrospective' analysis has  
719 already been carried out<sup>3149</sup>. For these cases, previous causal gene assignments were generally  
720 adopted. For novel loci, we employed a dual strategy that combined automated database mining  
721 with manual curation. In the automated phase, seven approaches were employed to identify  
722 potential causal genes among the 20 protein-coding genes closest to each lead variant, as described  
723 in detail below, using the shortest distance determined from the lead SNP to each gene's  
724 transcription start site (TSS) or transcription end site (TES), with a distance value of 0 assigned if the  
725 SNP fell between the TSS and TES.

726 These 7 approaches were as follows:

- 727 1) HMDB metabolite names<sup>50</sup> were compared to each entrez gene name;
- 728 2) Metabolite names were compared to the name and synonyms of the protein encoded by each  
729 gene<sup>51</sup>
- 730 3) HMDB metabolite names and their parent terms (class) were compared to the names for the  
731 protein encoded by each gene (UniProt).
- 732 4) Metabolite names were compared to rare diseases linked to each gene in OMIM<sup>32</sup> after  
733 removing the following non-specific substrings from disease names: uria, emia, deficiency, disease,

734 transient, neonatal, hyper, hypo, defect, syndrome, familial, autosomal, dominant, recessive, benign,  
735 infantile, hereditary, congenital, early-onset, idiopathic;

736 5) HMDB metabolite names and their parent terms were compared to all GO biological processes  
737 associated with each gene after removing the following non-specific substrings from the name of the  
738 biological process: metabolic process, metabolism, catabolic process, response to, positive  
739 regulation of, negative regulation of, regulation of. For this analysis only gene sets containing fewer  
740 than 500 gene annotations were retained.

741 6) KEGG maps<sup>52</sup> containing the metabolite as defined in HMDB were compared to KEGG maps  
742 containing each gene, as defined in KEGG. For this analysis the large “metabolic process” map was  
743 omitted.

744 7) Each proximal gene was compared to the list of known interacting genes as defined in HMDB.  
745 For each text-matching based approach, a fuzzy text similarity metric (pair coefficient) as encoded in  
746 the ruby gem “fuzzy\_match” was used with a score greater than 0.5 considered as a match.

747 In the next step, all automated hits at each locus were manually reviewed for plausibility. In  
748 addition, other genes at each locus were reviewed if the Entrez gene or UniProt description of the  
749 gene suggested it could potentially be related to the metabolite. If existing experimental evidence  
750 could be found linking one of the 20 closest genes to the metabolite, that gene was selected as the  
751 biologically most likely causal gene. If no clear experimental evidence existed for any of the 20  
752 closest protein coding genes, no causal gene was manually selected. In a few cases multiple genes at  
753 a locus had existing experimental evidence. This frequently occurs in the case of paralogs with  
754 similar molecule functions. In these cases, all such genes were flagged as likely causal genes.

755 For each manually selected causal gene, the earliest experimental evidence linking the gene  
756 (preferably the human gene) to the metabolite was identified. The median publication year for the  
757 identified experimental evidence was 2000.

## 758 **Enrichment of type 2 diabetes associations among metabolite associated lead variants**

759 We examined whether the set of independent lead metabolite associated variants (N=168)  
760 were enriched for associations with type 2 diabetes. We plotted observed versus expected  $-\log_{10}(p)$   
761 values) for the 168 lead variants in a QQ-plot, using association statistics from a type 2 diabetes  
762 meta-analysis including 80,983 cases and 842,909 non-cases from the DIAMANTE study<sup>53</sup> (55,005  
763 T2D cases, 400,308 non-cases), UK Biobank<sup>54</sup> (24,758 T2D cases, 424,575 non-cases, application  
764 number 44448) and the EPIC-Norfolk study (additional T2D cases not included in DIAMANTE study:  
765 1,220 T2D cases and 18,026 non-cases). This QQ-plot was compared to those for 1000 sets of



766 variants, where variants in each set were matched to the index metabolite variants in terms of MAF,  
767 the number of variants in LD ( $R^2 > 0.5$ ), gene density and distance to nearest gene (for all parameters  
768 +/- 50% of the index variant value), but otherwise randomly sampled from across the autosome  
769 excluding the HLA region. MAF and LD parameters for individual variants were determined from the  
770 EPIC-Norfolk study (using the combined HRC, UK10K and 1000G imputation as previously described)  
771 and gene information was derived from GENCODE v19 annotation<sup>55</sup>. A one-tailed Wilcoxon rank sum  
772 test was used to compare the distribution of association  $-\log_{10}$  p-values for the metabolite  
773 associated variants with that for the randomly sampled, matched, variants.

#### 774 **Functional characterisation of D470N mutant GLP2R**

775 To investigate the functional differences between wild-type (WT) GLP2R and the D470N  
776 mutant GLP2R we generated D470N GLP2R mutant constructs using site-directed mutagenesis and  
777 characterised canonical GLP2R signalling pathways via cAMP as well as alternative signalling  
778 pathways via  $\beta$ -arrestin and P-ERK.

#### 779 *Generation of D470N GLP2R mutant expressing constructs*

780 Human GLP2R cDNA within the pcDNA3.1+ vector was purchased, and Gibson cloning was  
781 completed to insert an internal ribosome entry site (IRES) and venus gene downstream of the GLP2R  
782 sequence. Following this, QuikChange Lightning site directed mutagenesis was used to perform a  
783 single base change from GAC (encoding aspartic acid) to AAC (encoding asparagine) at amino acid  
784 position 470 (**Supplemental Fig. 4A-B**). Successful mutagenesis was confirmed by DNA Sanger  
785 sequencing (**Supplemental Fig. 4C**), and the successful products were scaled up for use in functional  
786 assays. The WT and mutant GLP2R constructs within the pcDNA3.1+ vector were used to assess  
787 signalling by cAMP and P-ERK. To determine  $\beta$ -arrestin recruitment using NanoBiT<sup>®</sup> technology, an  
788 alternative vector was required for lower expression of GLP2R, and fusion of GLP2R to the Large BiT  
789 subunit of NanoBiT<sup>®</sup>. For this, GLP2R was cloned into the pBiT1.1\_C[TK/LgBiT] vector using  
790 restriction cloning and ligation. DNA Sanger sequencing was then used for confirmation of successful  
791 cloning.

#### 792 *Comparison of WT and D470N GLP2R signalling via cAMP*

793 After generation of WT and D470N GLP2R containing constructs, these were used to assess  
794 differences in WT and mutant GLP2R signalling. The initial signalling pathway to be assessed was G $\alpha$   
795 signalling via cAMP. CHO K1 cells were transiently transfected with WT or mutant GLP2R constructs,  
796 then after 16-24 hours were treated with a dose response of GLP-2. cAMP levels were measured  
797 following 30 minutes of GLP-2 treatment, in an end-point lysis HitHunter<sup>®</sup> cAMP assay. The presence  
798 of IRES-Venus within the GLP2R expressing vectors allowed transfection efficiency to be determined

799 for each construct. Transfection efficiency was approximately 60-70%, with no differences between  
800 the WT and mutant constructs. Comparison of the GLP-2 dose-response in WT and mutant GLP2R  
801 expressing cells revealed no significant differences in signalling, with an almost overlapping dose  
802 response curve (**Fig. 5E**).

### 803 *Comparison of $\beta$ -arrestin recruitment to the WT and D470N GLP2R*

804 Both  $\beta$ -arrestin 1 and  $\beta$ -arrestin 2 recruitment were assessed using a Nano-Glo<sup>®</sup> live cell  
805 assay in transiently transfected HEK293 cells. Briefly, the recruitment of  $\beta$ -arrestin to GLP2R brings  
806 the large and small BiT subunit of NanoBiT<sup>®</sup> together, resulting in increased luciferase activity. The  
807 top concentrations from the GLP-2 dose response in the cAMP assay (1–100 nmol/l GLP-2) were  
808 chosen for stimulation of the GLP2R and observation of  $\beta$ -arrestin recruitment. Both  $\beta$ -arrestin 1 and  
809  $\beta$ -arrestin 2 were recruited to the WT GLP2R upon GLP-2 stimulation, in a dose-dependent manner  
810 (**Supplemental Fig. 5a, c**). The maximal luciferase activity for both  $\beta$ -arrestin 1 and  $\beta$ -arrestin 2  
811 recruitment to the mutant GLP2R was significantly decreased when compared to the WT GLP2R,  
812 indicating the extent of  $\beta$ -arrestin recruitment was markedly decreased (**Supplemental Fig. 5b, d**).  
813 The example traces indicate that neither  $\beta$ -arrestin 1 or  $\beta$ -arrestin 2 were recruited to the mutant  
814 GLP2R upon stimulation with 1 nmol/l GLP-2, however the same concentration of GLP-2 induced  $\beta$ -  
815 arrestin recruitment to the WT GLP2R. Overall there was a significant decrease in  $\beta$ -arrestin 1 and  $\beta$ -  
816 arrestin 2 recruitment to the D470N GLP2R mutant (**Figure 5F-G**).

### 817 **Genetic score and Mendelian randomization analysis for macular telangiectasia type 2**

818 For each metabolite a genetic score (GS) was calculated using all variants meeting genome-  
819 wide significance and their beta-estimates as weights obtained from the meta-analysis of studies for  
820 which individual level data was available. We used fixed-effect meta-analysis to test for the effect of  
821 the GS on MacTel risk using the summary statistics from the most recent GWAS. A conservative  
822 Bonferroni-correction for the number of tested GS's was used to declare significance ( $p < 3.5 \times 10^{-4}$ ).  
823 Sensitivity analyses were performed where the pleiotropic *GCKR* variant was removed.

824 To test for causality between circulating levels of glycine and serine for MacTel we  
825 performed two types of Mendelian randomization (MR) analysis. In a two-sample univariable MR<sup>56</sup>  
826 we tested for an individual effect of serine (n=4 SNPs) or glycine (n=15 SNPs) on the risk of MacTel  
827 using independent non-pleiotropic (i.e. the variant in *GCKR*) genome-wide SNPs as instruments. To  
828 this end, we used the inverse variance weighted method to pool SNP ratio estimates using random  
829 effects as implemented in the R package *MendelianRandomization*. SNP effects on the risk for  
830 MacTel were obtained from<sup>28</sup>. To disentangle the individual effect of those two highly correlated  
831 metabolites at the same time we used a multivariable MR model<sup>57</sup> including all SNPs related to

832 serine or glycine (n=15 SNPs). Beta estimates and standard errors for both metabolites and all SNPs  
833 were obtained from the summary statistics and mutually used as exposure variables in multivariable  
834 MR. Effect estimates were again pooled using a random effect model as implemented in the R  
835 package *MendelianRandomization*. This procedure allowed us to obtain causal estimates for both  
836 metabolites while accounting for the effect on each other. Estimates can be interpreted as increase  
837 in risk for MacTel per 1 SD increase in metabolite levels while holding the other metabolite constant.

838 To estimate a potential clinical usefulness of the identified variants we constructed two  
839 GRS's for MacTel using a) sex, the first genetic principal component, and the SNPs rs73171800 and  
840 rs9820286 which were identified by the MacTel GWAS study<sup>28</sup> but not found to be related to either  
841 glycine or serine in our study and b) all the previous but additionally including genetically predicted  
842 serine and glycine at individual levels, via GS, to the model. An interaction between serine and sex at  
843 birth was included to reflect the interaction between SNP rs715 and sex as previously identified<sup>28</sup>.  
844 To assess the predictive ability of both models, receiver operating characteristic curves were  
845 computed based on prediction values in 1,733 controls and 476 MacTel cases.

#### 846 **Identification of genes related to inborn errors of metabolism**

847 Biologically or genetically assigned candidate genes were annotated for IEM association  
848 using the Orphanet database<sup>32</sup>. Using a binomial two-tailed test, enrichment of metabolic loci was  
849 assessed by comparing the annotated list with the full list of 784 IEM genes in Orphanet against a  
850 backdrop of 19,817 protein-coding genes<sup>58</sup>. IEM-annotated loci for which the associated metabolite  
851 matched or was closely biochemically related to the IEM corresponding metabolite(s) based on  
852 IEMBase<sup>59</sup> were considered further for analysis.

853 We hypothesised that IEM-annotated loci with metabolite-specific consequences could also  
854 have phenotypic consequences similar to the IEM. To test this, we first obtained terms describing  
855 each IEM and translated them into IEM-related ICD-10 codes using the Human Phenotype Ontology  
856 and previously-generated mappings<sup>60,61</sup>. We obtained association statistics from the 85 IEM SNPs for  
857 phenotypic associations with corresponding ICD-codes among UK Biobank restricting to diseases  
858 with at least 500 cases (N=93, **Fig. 7B**, <http://www.nealelab.is/uk-biobank>). We tested locus-disease  
859 pairs meeting statistical significance (controlling the false discovery rate at 5% to account for  
860 multiple testing) for a common genetic signal with the corresponding locus-metabolite association  
861 using statistical colocalisation. Because of the hypothesis-driven nature of the approach, i.e. prior  
862 knowledge of the causal gene and metabolite effect for a given IEM, we adopted an FDR-based  
863 strategy to account for multiple testing. We further highlight only those examples with strong  
864 evidence for a shared genetic signal (see below).

865 **Colocalisation analyses**

866 We used statistical colocalisation<sup>62</sup> to test for a shared genetic signal between a metabolite and  
867 a disease of interest. We obtained posterior probabilities (PP) of: H0 – no signal; H1 – signal unique  
868 to the metabolite; H2 – signal unique to the trait; H3 – two distinct causal variants in the same locus  
869 and H4 – presence of a shared causal variant between a metabolite and a given trait. PPs above 80%  
870 were considered highly likely. We used p-values and MAFs obtained from the summary statistics  
871 with default priors to perform colocalisation.

872 **Acknowledgement/Funding**

873 M.P. was supported by a fellowship from the German Research Foundation (DFG PI 1446/2-1). C.O.  
874 was founded by an early career fellowship at Homerton College, University of Cambridge. L. B. L. W.  
875 acknowledges funding by the Wellcome Trust (WT083442AIA). J.G. was supported by grants from  
876 the Medical Research Council (MC\_UP\_A090\_1006, MC\_PC\_13030, MR/P011705/1 and  
877 MR/P01836X/1). Work in the Reimann/Gribble laboratories was supported by the Wellcome Trust  
878 (106262/Z/14/Z and 106263/Z/14/Z), UK Medical Research Council (MRC\_MC\_UU\_12012/3) and  
879 PhD funding for EKB from MedImmune/AstraZeneca. Praveen Surendran is supported by a  
880 Rutherford Fund Fellowship from the Medical Research Council grant MR/S003746/1. A. W. is  
881 supported by a BHF-Turing Cardiovascular Data Science Award and by the EC-Innovative Medicines  
882 Initiative (BigData@Heart). J.D. is funded by the National Institute for Health Research [Senior  
883 Investigator Award] [\*]. The EPIC-Norfolk study (<https://doi.org/10.22025/2019.10.105.00004>) has  
884 received funding from the Medical Research Council (MR/N003284/1 and MC-UU\_12015/1) and  
885 Cancer Research UK (C864/A14136). The genetics work in the EPIC-Norfolk study was funded by the  
886 Medical Research Council (MC\_PC\_13048). Metabolite measurements in the EPIC-Norfolk study  
887 were supported by the MRC Cambridge Initiative in Metabolic Science (MR/L00002/1) and the  
888 Innovative Medicines Initiative Joint Undertaking under EMIF grant agreement no. 115372. We are  
889 grateful to all the participants who have been part of the project and to the many members of the  
890 study teams at the University of Cambridge who have enabled this research. The Fenland Study is  
891 supported by the UK Medical Research Council (MC\_UU\_12015/1 and MC\_PC\_13046). Participants  
892 in the INTERVAL randomised controlled trial were recruited with the active collaboration of NHS  
893 Blood and Transplant England ([www.nhsbt.nhs.uk](http://www.nhsbt.nhs.uk)), which has supported field work and other  
894 elements of the trial. DNA extraction and genotyping was co-funded by the National Institute for  
895 Health Research (NIHR), the NIHR BioResource (<http://bioresource.nihr.ac.uk>) and the NIHR  
896 [Cambridge Biomedical Research Centre at the Cambridge University Hospitals NHS Foundation  
897 Trust] [\*]. Nightingale Health NMR assays were funded by the European Commission Framework  
898 Programme 7 (HEALTH-F2-2012-279233). Metabolon Metabolomics assays were funded by the NIHR

899 BioResource and the National Institute for Health Research [Cambridge Biomedical Research Centre  
900 at the Cambridge University Hospitals NHS Foundation Trust] [\*]. The academic coordinating centre  
901 for INTERVAL was supported by core funding from: NIHR Blood and Transplant Research Unit in  
902 Donor Health and Genomics (NIHR BTRU-2014-10024), UK Medical Research Council  
903 (MR/L003120/1), British Heart Foundation (SP/09/002; RG/13/13/30194; RG/18/13/33946) and the  
904 NIHR [Cambridge Biomedical Research Centre at the Cambridge University Hospitals NHS Foundation  
905 Trust] [\*]. The academic coordinating centre would like to thank blood donor centre staff and blood  
906 donors for participating in the INTERVAL trial.

907 This work was supported by Health Data Research UK, which is funded by the UK Medical Research  
908 Council, Engineering and Physical Sciences Research Council, Economic and Social Research Council,  
909 Department of Health and Social Care (England), Chief Scientist Office of the Scottish Government  
910 Health and Social Care Directorates, Health and Social Care Research and Development Division  
911 (Welsh Government), Public Health Agency (Northern Ireland), British Heart Foundation and  
912 Wellcome.

913 \*The views expressed are those of the author(s) and not necessarily those of the NHS, the NIHR or  
914 the Department of Health and Social Care.

915 UK Biobank: This research has been conducted using the UK Biobank resource under  
916 Application Number 44448.

#### 917 **Author Contribution**

918 Concept and design: L.A.L. and C.L.

919 Generation, acquisition, analysis and/or interpretation of data: all authors.

920 Drafting of the manuscript: L.A.L., M.P., and C.L.

921 Critical review of the manuscript for important intellectual content and approval of the final version  
922 of the manuscript: all authors.

#### 923 **Competing Interests statement**

924 A.S.B. has received grants from AstraZeneca, Biogen, Bioverativ, Merck, Novartis, and Sanofi. J. D.  
925 sits on the International Cardiovascular and Metabolic Advisory Board for Novartis (since 2010), the  
926 Steering Committee of UK Biobank (since 2011), the MRC International Advisory Group (ING)  
927 member, London (since 2013), the MRC High Throughput Science 'Omics Panel Member, London  
928 (since 2013), the Scientific Advisory Committee for Sanofi (since 2013), the International

929 Cardiovascular and Metabolism Research and Development Portfolio Committee for Novartis and  
930 the Astra Zeneca Genomics Advisory Board (2018). E.B.F. is an employee and stock holder of Pfizer.

### 931 **Data Availability**

932 All genome-wide summary statistics will be made available through an interactive webserver upon  
933 publication of the manuscript.

### 934 **Code Availability**

935 Each use of software programs has been clearly indicated and information on the options that were  
936 used is provided in the Methods section. Source code to call programs is available upon request.

### 937 **REFERENCES**

- 938 1. Wishart, D. S. Metabolomics for investigating physiological and pathophysiological processes.  
939 *Physiol. Rev.* **99**, 1819–1875 (2019).
- 940 2. Shin, S.-Y. Y. *et al.* An atlas of genetic influences on human blood metabolites. *Nat. Genet.* **46**,  
941 543–550 (2014).
- 942 3. Long, T. *et al.* Whole-genome sequencing identifies common-to-rare variants associated with  
943 human blood metabolites. *Nat. Genet.* **49**, 568–578 (2017).
- 944 4. Draisma, H. H. M. *et al.* Genome-wide association study identifies novel genetic variants  
945 contributing to variation in blood metabolite levels. *Nat. Commun.* **6**, 7208 (2015).
- 946 5. Kettunen, J. *et al.* Genome-wide study for circulating metabolites identifies 62 loci and  
947 reveals novel systemic effects of LPA. *Nat. Commun.* **7**, 11122 (2016).
- 948 6. Illig, T. *et al.* A genome-wide perspective of genetic variation in ... [Nat Genet. 2010] -  
949 PubMed result. *Nat. Genet.* **42**, 137–41 (2010).
- 950 7. Suhre, K. *et al.* Human metabolic individuality in biomedical and pharmaceutical research.  
951 *Nature* **477**, 54–60 (2011).
- 952 8. Rhee, E. P. P. *et al.* A genome-wide association study of the human metabolome in a  
953 community-based cohort. *Cell Metab.* **18**, 130–43 (2013).
- 954 9. Gallois, A. *et al.* A comprehensive study of metabolite genetics reveals strong pleiotropy and  
955 heterogeneity across time and context. *Nat. Commun.* **10**, 1–13 (2019).
- 956 10. Rhee, E. P. *et al.* An exome array study of the plasma metabolome. *Nat. Commun.* **7**, 12360  
957 (2016).
- 958 11. Astle, W. J. *et al.* The Allelic Landscape of Human Blood Cell Trait Variation and Links to  
959 Common Complex Disease. *Cell* **167**, 1415–1429.e19 (2016).
- 960 12. Bansal, N. *et al.* Genomic atlas of the human plasma proteome. *Nature* **558**, 73–79 (2018).
- 961 13. Learn, D. B., Fried, V. A. & Thomas, E. L. Taurine and hypotaurine content of human  
962 leukocytes. *J. Leukoc. Biol.* **48**, 174–182 (1990).
- 963 14. Yet, I. *et al.* Genetic Influences on Metabolite Levels: A Comparison across Metabolomic  
964 Platforms. *PLoS One* **11**, e0153672 (2016).
- 965 15. Foley, C. N. *et al.* A fast and efficient colocalization algorithm for identifying shared genetic  
966 risk factors across multiple traits. **44**, 1–47 (2019).
- 967 16. Pedersen, C. B. *et al.* The ACADS gene variation spectrum in 114 patients with short-chain  
968 acyl-CoA dehydrogenase (SCAD) deficiency is dominated by missense variations leading to  
969 protein misfolding at the cellular level. *Hum Genet* **124**, 43–56 (2008).
- 970 17. Lahiri, S. *et al.* Kinetic characterization of mammalian ceramide synthases: Determination of  
971 Km values towards sphinganine. *FEBS Lett.* **581**, 5289–5294 (2007).
- 972 18. Horowitz, B. *et al.* Asparagine synthetase activity of mouse leukemias. *Science (80-. ).* **160**,



- 973 533–535 (1968).
- 974 19. Babu, E. *et al.* Identification of a Novel System L Amino Acid Transporter Structurally Distinct  
975 from Heterodimeric Amino Acid Transporters. *J. Biol. Chem.* **278**, 43838–43845 (2003).
- 976 20. Scott, R. A. *et al.* An Expanded Genome-Wide Association Study of Type 2 Diabetes in  
977 Europeans. *Diabetes* **66**, 2888–2902 (2017).
- 978 21. Wheeler, E. *et al.* Impact of common genetic determinants of Hemoglobin A1c on type 2  
979 diabetes risk and diagnosis in ancestrally diverse populations: A transethnic genome-wide  
980 meta-analysis. *PLoS Med.* **14**, (2017).
- 981 22. Prokopenko, I., Poon, W., Mägi, R., Prasad, B. R. & Salehi, S. A. A Central Role for GRB10 in  
982 Regulation of Islet Function in Man. *Claire Levy-Marchal* **17**,.
- 983 23. Manning, A. K. *et al.* A genome-wide approach accounting for body mass index identifies  
984 genetic variants influencing fasting glycemic traits and insulin resistance. *Nat. Genet.* **44**, 659–  
985 669 (2012).
- 986 24. Almgren, P. *et al.* Genetic determinants of circulating GIP and GLP-1 concentrations. (2017)  
987 doi:10.1172/jci.insight.93306.
- 988 25. Fragkos, K. C. & Forbes, A. *Citrulline as a marker of intestinal function and absorption in*  
989 *clinical settings: A systematic review and meta-analysis. United European Gastroenterology*  
990 *Journal* vol. 6 181–191 (SAGE Publications Ltd, 2018).
- 991 26. Tseng, C. C. & Zhang, X. Y. The cysteine of the cytoplasmic tail of glucose-dependent  
992 insulinotropic peptide receptor mediates its chronic desensitization and down-regulation.  
993 *Mol. Cell. Endocrinol.* **139**, 179–186 (1998).
- 994 27. Estall, J. L., Koehler, J. A., Yusta, B. & Drucker, D. J. The glucagon-like peptide-2 receptor C  
995 terminus modulates  $\beta$ -arrestin-2 association but is dispensable for ligand-induced  
996 desensitization, endocytosis, and G-protein-dependent effector activation. *J. Biol. Chem.* **280**,  
997 22124–22134 (2005).
- 998 28. Scerri, T. S. *et al.* Genome-wide analyses identify common variants associated with macular  
999 telangiectasia type 2. *Nat. Genet.* **49**, 559–567 (2017).
- 1000 29. Gantner, M. L. *et al.* Serine and lipid metabolism in macular disease and peripheral  
1001 neuropathy. *N. Engl. J. Med.* **381**, 1422–1433 (2019).
- 1002 30. Garrod, A. E. The incidence of alkaptonuria: a study in chemical individuality. *Lancet* **160**,  
1003 1616–1620 (1902).
- 1004 31. Shin, S. Y. *et al.* An atlas of genetic influences on human blood metabolites. *Nat. Genet.* **46**,  
1005 543–550 (2014).
- 1006 32. Rath, A. *et al.* Representation of rare diseases in health information systems: The orphanet  
1007 approach to serve a wide range of end users. *Hum. Mutat.* **33**, 803–808 (2012).
- 1008 33. Stübiger, G. *et al.* Targeted profiling of atherogenic phospholipids in human plasma and  
1009 lipoproteins of hyperlipidemic patients using MALDI-QIT-TOF-MS/MS. *Atherosclerosis* **224**,  
1010 177–186 (2012).
- 1011 34. Van Der Graaf, A., Kastelein, J. J. P. P. & Wiegman, A. *Heterozygous familial*  
1012 *hypercholesterolaemia in childhood: Cardiovascular risk prevention. Journal of Inherited*  
1013 *Metabolic Disease* vol. 32 (2009).
- 1014 35. Lindsay, T. *et al.* Descriptive epidemiology of physical activity energy expenditure in UK adults  
1015 (The Fenland study). *Int. J. Behav. Nutr. Phys. Act.* **16**, 126 (2019).
- 1016 36. Day, N. *et al.* EPIC-Norfolk: study design and characteristics of the cohort. European  
1017 Prospective Investigation of Cancer. *Br. J. Cancer* **80 Suppl 1**, 95–103 (1999).
- 1018 37. Moore, C. *et al.* The INTERVAL trial to determine whether intervals between blood donations  
1019 can be safely and acceptably decreased to optimise blood supply: Study protocol for a  
1020 randomised controlled trial. *Trials* **15**, (2014).
- 1021 38. Soininen, P. *et al.* High-throughput serum NMR metabolomics for cost-effective holistic  
1022 studies on systemic metabolism. *Analyst* **134**, 1781–5 (2009).
- 1023 39. Wittemans, L. B. L. *et al.* Assessing the causal association of glycine with risk of cardio-

- 1024 metabolic diseases. *Nat. Commun.* **10**, (2019).
- 1025 40. Lotta, L. A. *et al.* Genetic Predisposition to an Impaired Metabolism of the Branched-Chain  
1026 Amino Acids and Risk of Type 2 Diabetes: A Mendelian Randomisation Analysis. *PLoS Med.*  
1027 (2016) doi:10.1371/journal.pmed.1002179.
- 1028 41. Di Angelantonio, E. *et al.* Efficiency and safety of varying the frequency of whole blood  
1029 donation (INTERVAL): a randomised trial of 45 000 donors. *Lancet* **390**, 2360–2371 (2017).
- 1030 42. Inouye, M. *et al.* Metabonomic, transcriptomic, and genomic variation of a population cohort.  
1031 *Mol. Syst. Biol.* **6**, 441 (2010).
- 1032 43. Purcell, S. *et al.* PLINK: A tool set for whole-genome association and population-based linkage  
1033 analyses. *Am. J. Hum. Genet.* **81**, 559–575 (2007).
- 1034 44. Anderson, C. A. *et al.* Data quality control in genetic case-control association studies. *Nat.*  
1035 *Protoc.* **5**, 1564–1573 (2011).
- 1036 45. Li, J. & Ji, L. Adjusting multiple testing in multilocus analyses using the eigenvalues of a  
1037 correlation matrix. *Heredity (Edinb.)* **95**, 221–227 (2005).
- 1038 46. Wakefield, J. Bayes Factors for Genome-Wide Association Studies : Comparison with P -  
1039 values. **86**, 79–86 (2009).
- 1040 47. Ward, L. D. & Kellis, M. HaploReg: A resource for exploring chromatin states, conservation,  
1041 and regulatory motif alterations within sets of genetically linked variants. *Nucleic Acids Res.*  
1042 **40**, (2012).
- 1043 48. Gusev, A. *et al.* Integrative approaches for large-scale transcriptome-wide association studies.  
1044 *Nat. Genet.* **48**, 245–252 (2016).
- 1045 49. Stacey, D. *et al.* ProGeM: A framework for the prioritization of candidate causal genes at  
1046 molecular quantitative trait loci. *Nucleic Acids Res.* **47**, (2019).
- 1047 50. Wishart, D. S. *et al.* HMDB 4.0: The human metabolome database for 2018. *Nucleic Acids Res.*  
1048 **46**, D608–D617 (2018).
- 1049 51. Bateman, A. *et al.* UniProt: The universal protein knowledgebase. *Nucleic Acids Res.* **45**,  
1050 D158–D169 (2017).
- 1051 52. Kanehisa, M., Furumichi, M., Tanabe, M., Sato, Y. & Morishima, K. KEGG: New perspectives  
1052 on genomes, pathways, diseases and drugs. *Nucleic Acids Res.* **45**, D353–D361 (2017).
- 1053 53. Mahajan, A. *et al.* Fine-mapping type 2 diabetes loci to single-variant resolution using high-  
1054 density imputation and islet-specific epigenome maps. *Nat. Genet.* **50**, 1505–1513 (2018).
- 1055 54. Sudlow, C. *et al.* UK Biobank: An Open Access Resource for Identifying the Causes of a Wide  
1056 Range of Complex Diseases of Middle and Old Age. *PLoS Med.* **12**, (2015).
- 1057 55. Frankish, A. *et al.* GENCODE reference annotation for the human and mouse genomes.  
1058 *Nucleic Acids Res.* **47**, D766–D773 (2019).
- 1059 56. Burgess, S., Butterworth, A. & Thompson, S. G. Mendelian randomization analysis with  
1060 multiple genetic variants using summarized data. *Genet. Epidemiol.* **37**, 658–665 (2013).
- 1061 57. Burgess, S. & Thompson, S. G. Multivariable Mendelian randomization: The use of pleiotropic  
1062 genetic variants to estimate causal effects. *Am. J. Epidemiol.* **181**, 251–260 (2015).
- 1063 58. Harrow, J. *et al.* GENCODE: The reference human genome annotation for the ENCODE  
1064 project. *Genome Res.* **22**, 1760–1774 (2012).
- 1065 59. Lee, J. J. Y., Wasserman, W. W., Hoffmann, G. F., Van Karnebeek, C. D. M. & Blau, N.  
1066 Knowledge base and mini-expert platform for the diagnosis of inborn errors of metabolism.  
1067 *Genet. Med.* **20**, 151–158 (2018).
- 1068 60. Köhler, S. *et al.* The human phenotype ontology in 2017. *Nucleic Acids Res.* **45**, D865–D876  
1069 (2017).
- 1070 61. Wu, P. *et al.* Mapping ICD-10 and ICD-10-CM codes to phecodes: Workflow development and  
1071 initial evaluation. *J. Med. Internet Res.* **21**, (2019).
- 1072 62. Giambartolomei, C. *et al.* Bayesian test for colocalisation between pairs of genetic association  
1073 studies using summary statistics. *PLoS Genet.* **10**, e1004383 (2014).
- 1074

1075 **TABLES**

1076

1077 **Table 1** Genomic loci with effect sizes larger than 0.25 units in standard deviation of metabolite  
 1078 levels per allele.

| rsID       | Position*    | Metabolite               | EA/OA | EAF  | N     | MA p-value | Beta (se)**  | Candidate genes        | Expl. var. (%) |
|------------|--------------|--------------------------|-------|------|-------|------------|--------------|------------------------|----------------|
| rs13538    | 2:73868328   | Acetylmethionine         | A/G   | 0.78 | 30692 | 1.99E-1984 | 0.85 (0.01)  | <i>NAT8, ACTG2</i>     | 18.4           |
| rs3916     | 12:121177272 | Butyrylcarnitine         | C/G   | 0.26 | 30694 | 1.67E-2010 | 0.81 (0.01)  | <i>ACADS,</i>          | 16.9           |
| rs12587599 | 14:104575130 | Asparagine               | T/C   | 0.14 | 23606 | 8.98E-294  | 0.49 (0.013) | <i>ASPG, ADSSL1</i>    | 8.2            |
| rs3970551  | 22:18906839  | Proline                  | G/A   | 0.11 | 23618 | 1.10E-224  | 0.48 (0.015) | <i>PRODH</i>           | 5.0            |
| rs174547   | 11:61570783  | lysoPC a C20:4           | T/C   | 0.67 | 16829 | 4.42E-398  | 0.47 (0.015) | <i>FADS1, DAGLA</i>    | 9.9            |
| rs174545   | 11:61569306  | PC aa C38:4              | C/G   | 0.67 | 16828 | 1.37E-361  | 0.45 (0.015) | <i>FADS1,</i>          | 9.2            |
| rs715      | 2:211543055  | Glycine                  | C/T   | 0.31 | 80000 | 3.00E-1632 | 0.44 (0.006) | <i>CPS1, IDH1</i>      | 12.9           |
| rs174564   | 11:61588305  | PC ae C42:3              | A/G   | 0.66 | 9363  | 5.72E-183  | 0.44 (0.015) | <i>FADS1, DAGLA</i>    | 8.9            |
| rs174547   | 11:61570783  | PC aa C36:4              | T/C   | 0.67 | 16830 | 3.25e-313  | 0.43 (0.015) | <i>FADS1, DAGLA</i>    | 8.6            |
| rs1171617  | 10:61467182  | Carnitine                | T/G   | 0.77 | 31001 | 2.06E-444  | 0.43 (0.011) | <i>SLC16A9,</i>        | 7.0            |
| rs102275   | 11:61557803  | PC ae C40:5              | T/C   | 0.67 | 16839 | 8.23E-202  | 0.43 (0.015) | <i>C11orf10, DAGLA</i> | 8.7            |
| rs7157785  | 14:64235556  | PC aa C28:1              | T/G   | 0.16 | 16833 | 4.60E-136  | 0.35 (0.019) | <i>SGPP1, SYNE2</i>    | 3.3            |
| rs174547   | 11:61570783  | PC ae C36:5              | T/C   | 0.67 | 16828 | 2.48E-185  | 0.33 (0.015) | <i>FADS1, DAGLA</i>    | 5.1            |
| rs102275   | 11:61557803  | PC aa C38:5              | T/C   | 0.67 | 16836 | 8.31E-198  | 0.33 (0.015) | <i>C11orf10, DAGLA</i> | 5.0            |
| rs174564   | 11:61588305  | PC ae C42:2              | A/G   | 0.66 | 9363  | 7.04E-99   | 0.32 (0.015) | <i>FADS1, DAGLA</i>    | 4.8            |
| rs174564   | 11:61588305  | lysoPC a C26:1           | A/G   | 0.66 | 9363  | 1.38E-91   | 0.32 (0.016) | <i>FADS1, DAGLA</i>    | 4.6            |
| rs7157785  | 14:64235556  | SM (OH) C14:1            | T/G   | 0.16 | 16833 | 1.65E-96   | 0.29 (0.019) | <i>SGPP1</i>           | 2.2            |
| rs174546   | 11:61569830  | PC aa C24:0              | C/T   | 0.67 | 13184 | 4.16E-89   | 0.29 (0.016) | <i>FADS1, DAGLA</i>    | 3.6            |
| rs174546   | 11:61569830  | PC ae C38:5              | C/T   | 0.67 | 16839 | 8.98E-146  | 0.29 (0.015) | <i>FADS1, DAGLA</i>    | 3.9            |
| rs7552404  | 1:76135946   | Octanoylcarnitine        | A/G   | 0.69 | 31969 | 2.30E-260  | 0.28 (0.01)  | <i>ACADM</i>           | 2.8            |
| rs1171615  | 10:61469090  | Propionylcarnitine       | T/C   | 0.77 | 32590 | 7.09E-185  | 0.27 (0.011) | <i>SLC16A9</i>         | 3.1            |
| rs1171617  | 10:61467182  | Acetylcarnitine          | T/G   | 0.77 | 31008 | 1.92E-156  | 0.27 (0.011) | <i>SLC16A9</i>         | 3.3            |
| rs2286963  | 2:211060050  | Nonacylcarnitine         | G/T   | 0.36 | 13925 | 5.46E-159  | 0.26 (0.016) | <i>ACADL</i>           | 3.2            |
| rs12210538 | 6:110760008  | Octadecandienylcarnitine | A/G   | 0.77 | 30227 | 1.69E-144  | 0.26 (0.011) | <i>SLC22A16</i>        | 1.0            |
| rs102275   | 11:61557803  | PC aa C36:5              | T/C   | 0.66 | 16835 | 2.09E-120  | 0.25 (0.015) | <i>C11orf10, DAGLA</i> | 3.0            |
| rs174550   | 11:61571478  | PC ae C36:3              | C/T   | 0.33 | 16830 | 2.05E-105  | 0.25 (0.015) | <i>FADS1, DAGLA</i>    | 2.7            |

EA = effect allele; OA = other allele; MA = meta-analysis; se = standard error; \*Chromosome:Position based on Genome Reference Consortium Human Build 37; \*\*based on meta-analysis across cohorts for which individual-level data was available (more information is provided in Supplementary Tab. S2).

1079

1080

1081

1082

1083

1084 **Table 2** Results from Mendelian randomisation (MR) analysis between metabolite levels and risk of  
1085 macular telangiectasia type 2.

1086

| <b>Metabolite</b>          | <b>Univariable MR</b>  | <b>Multivariable MR</b> |
|----------------------------|------------------------|-------------------------|
| <i>Serine</i> (4 SNPs)     |                        |                         |
| Odds ratio per SD increase | 0.06 (0.03; 0.13)      | 0.10 (0.05; 0.21)       |
| p-value                    | $9.45 \times 10^{-12}$ | $2.95 \times 10^{-9}$   |
| <i>Glycine</i> (15 SNPs)   |                        |                         |
| Odds ratio per SD increase | 0.17 (0.08; 0.37)      | 0.50 (0.29; 0.87)       |
| p-value                    | $9.99 \times 10^{-6}$  | $1.35 \times 10^{-2}$   |

1087

1088

1089

MR estimates are based on the inverse variance-weighted method using random effects to pool estimates. All single nucleotide polymorphisms (SNPs) significantly associated with either serine or glycine have been included in multivariable MR analysis. SD = standard deviation

1090
